# Supplementary material for: A systematic theoretical study of CO2 hydrogenation towards methanol on Cu-based bimetallic catalysts: role of the CHO&CH3OH descriptor in thermodynamic analysis
Source: Royal Society of Chemistry journal article supplement (doi:10.1039/d4cp01009d), 2024-01-01
Supplement: d4cp01009d1.pdf [file d4cp01009d1.pdf]

*A systematic theoretical study of CO<sub>2</sub> hydrogenation towards methanol on Cu-based bimetallic catalysts:*

*Role of CHO&CH<sub>3</sub>OH descriptor in thermodynamic analysis*

Huang Qin, Hai Zhang\*, Kunmin Wu, Xingzi Wang, Weidong Fan

*School of Mechanical Engineering, Shanghai Jiao Tong University, Shanghai 200240, China*

---

\* Corresponding author.  
Telephone: 021-34206052  
E-mail: [zhanghai@sjtu.edu.cn](mailto:zhanghai@sjtu.edu.cn)

## Evaluation details

To assess the predictive performance, three metrics were employed, that was, the Pearson correlation coefficient ( $PCC$ ), determination coefficient ( $R^2$ ) and mean-average error ( $MAE$ ). Of these,  $PCC$  was mathematically represented by Eq. (1):

$$PCC = \frac{Cov(x,y)}{\sigma_x \sigma_y} \quad (1)$$

where  $Cov(X,Y)$  signified the covariance between variables  $x$  and  $y$ , while  $\sigma_x$  and  $\sigma_y$  were their respective standard deviations.  $R^2$  was introduced to evaluate the fitting degree of the learning model, as recorded in Eq. (2):

$$R^2 = \frac{\sum_{i=1}^n (y_i - f_i)^2}{\sum_{i=1}^n (y_i - \bar{y})^2} \quad (2)$$

where  $y_i$  and  $f_i$  referred to the true and predicted values, respectively.  $\bar{y}$  denoted the mean of the true values, and a higher value of  $R^2$  indicated a stronger fit of learning models. Besides that,  $MAE$ , an essential indicator for quantifying the disparity between predicted and actual values, was formulated in Eq. (3):

$$MAE = \frac{\sum_{i=1}^n |y_i - f_i|}{n} \quad (3)$$



## 1. Figure captions

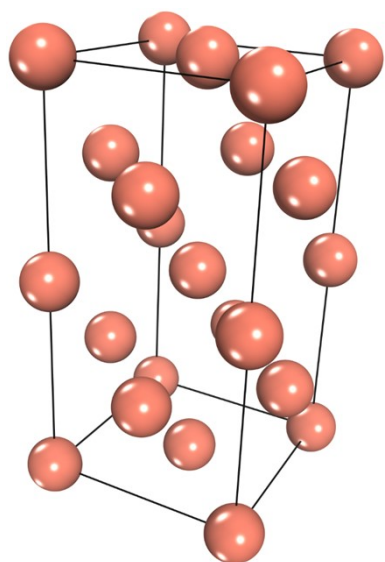

(a) Pure Cu

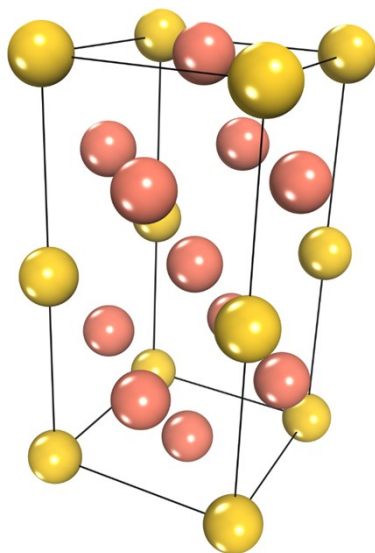

(b) Au-Cu

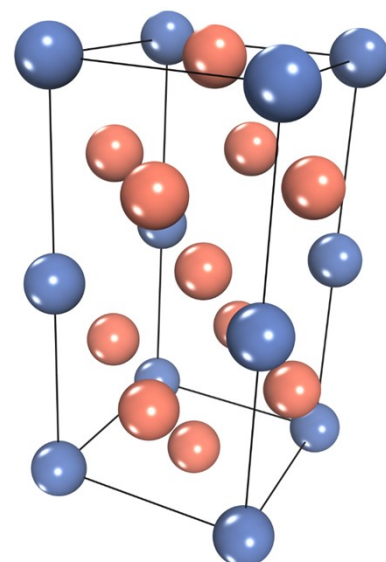

(c) Ni-Cu

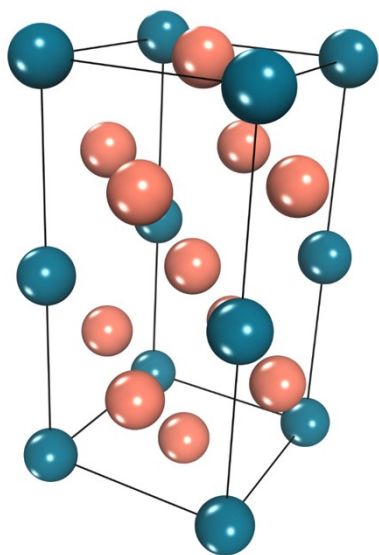

(d) Pd-Cu

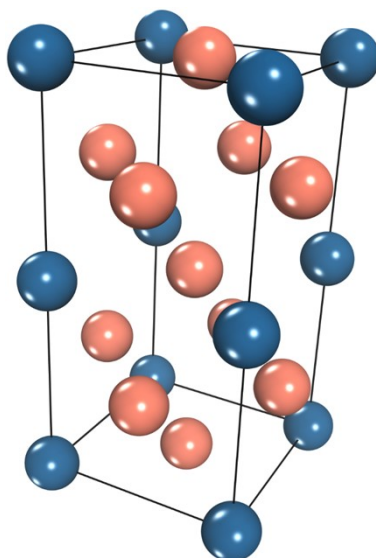

(e) Pt-Cu

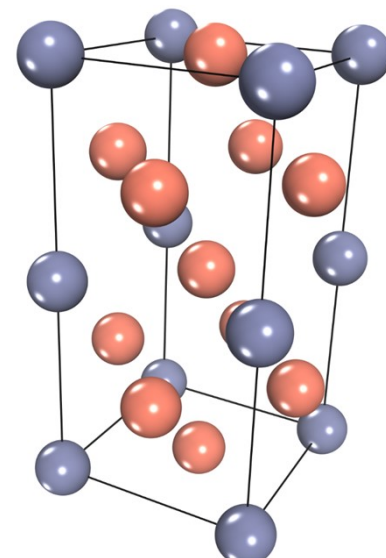

(f) Zn-Cu

Fig. S1. Geometric structures of  $1 \times 1 \times 2$  crystal configuration for (a) pure Cu, (b) Au-Cu, (c) Ni-Cu, (d) Pd-Cu, (e) Pt-Cu and (f) Zn-Cu.

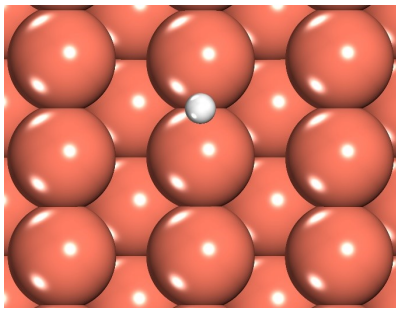

(a) H

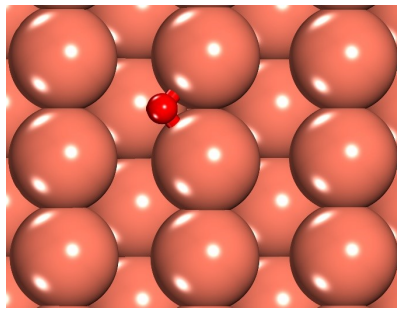

(b) O

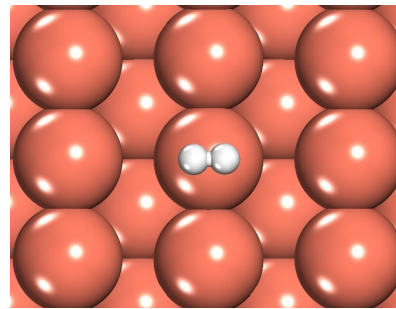

(c) H<sub>2</sub>

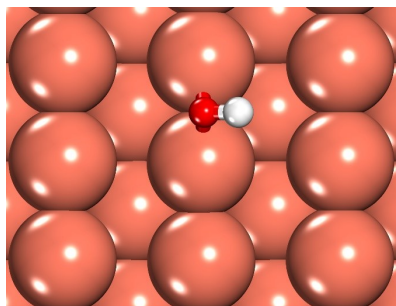

(d) OH

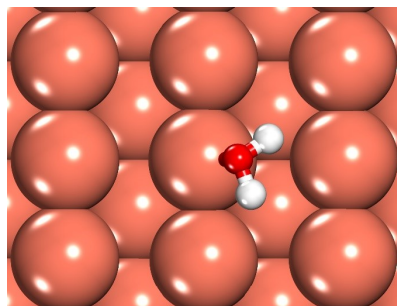

(e) H<sub>2</sub>O

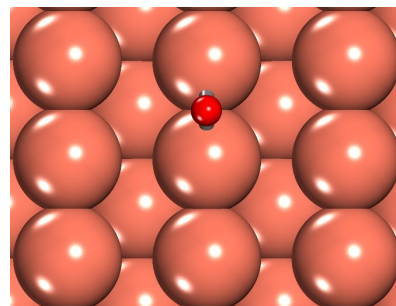

(f) CO

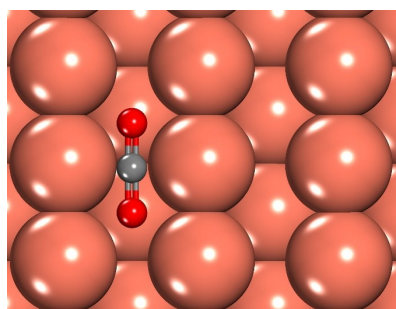

(g) CO<sub>2</sub>

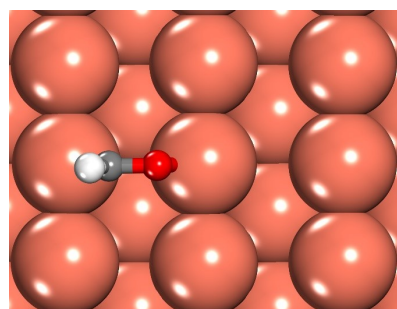

(h) CHO

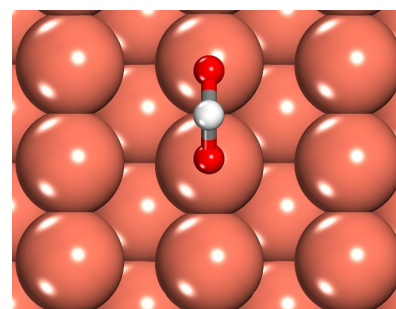

(i) bi-HCOO

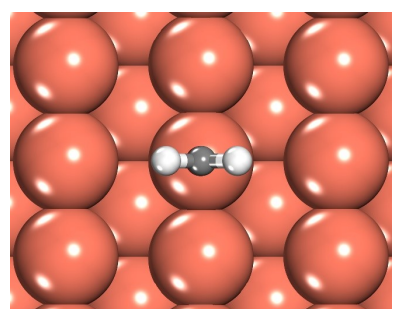

(j) mono-H<sub>2</sub>CO

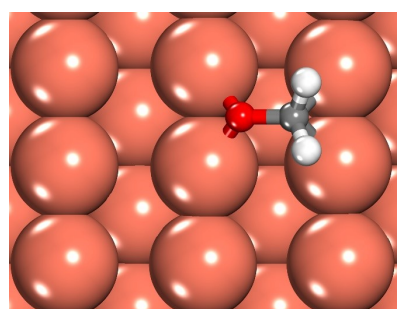

(k) bi-H<sub>2</sub>CO

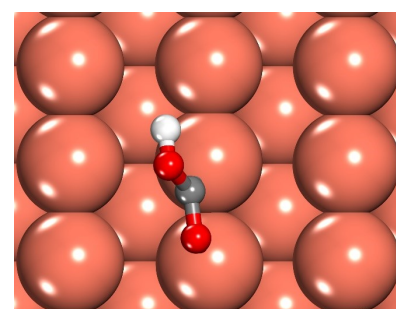

(l) trans-COOH

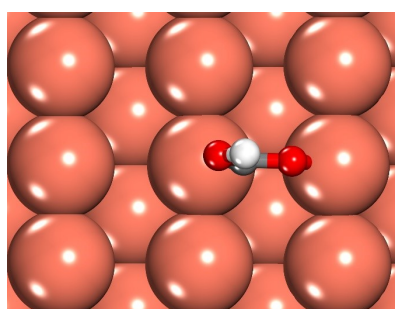

(m) cis-COOH

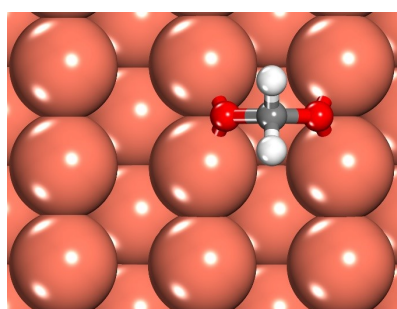

(n) H<sub>2</sub>COO

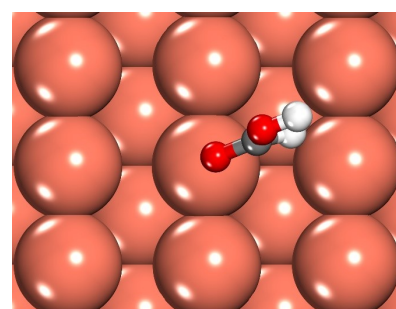

(o) HCOOH



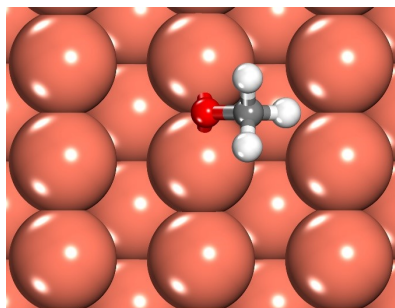

(p) CH<sub>3</sub>O

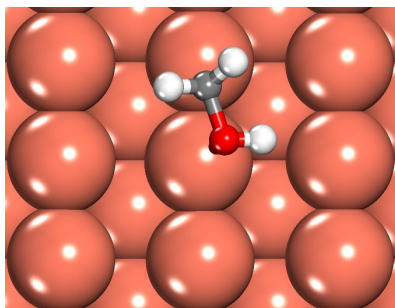

(q) CH<sub>2</sub>OH

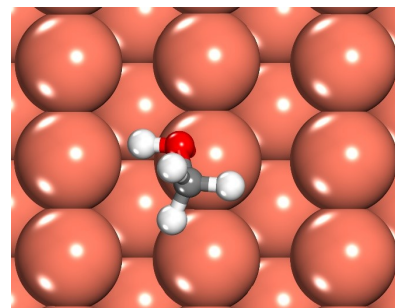

(r) CH<sub>3</sub>OH

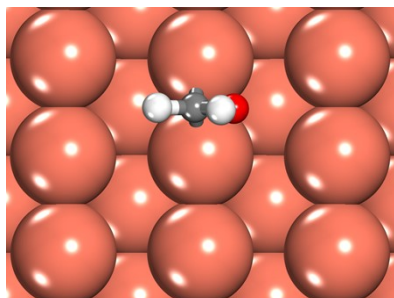

(s) CHOH

Fig. S2. Optimal configurations of reaction intermediates adsorbed on Cu substrate, containing (a) H\*, (b) O\*, (c) H<sub>2</sub>\*, (d) OH\*, (e) H<sub>2</sub>O\*, (f) CO\*, (g) CO<sub>2</sub>\*, (h) CHO\*, (i) bi-HCOO\*, (j) mono-H<sub>2</sub>CO\*, (k) bi-H<sub>2</sub>CO\*, (l) trans-COOH\*, (m) cis-COOH\*, (n) H<sub>2</sub>COO\*, (o) HCOOH\*, (p) CH<sub>3</sub>O\*, (q) CH<sub>2</sub>OH\*, (r) CH<sub>3</sub>OH\* and (s) CHOH.

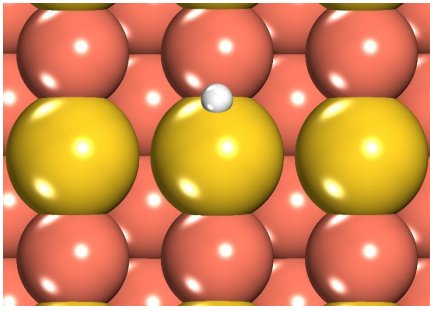

(a) H

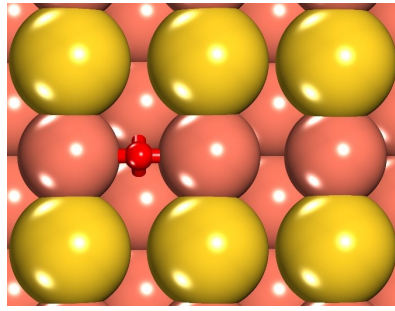

(b) O

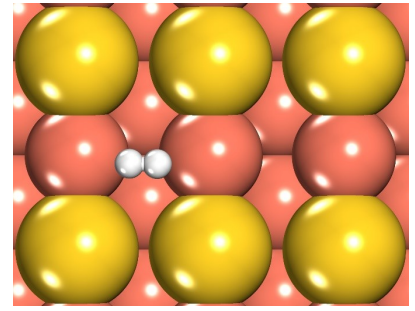

(c) H<sub>2</sub>

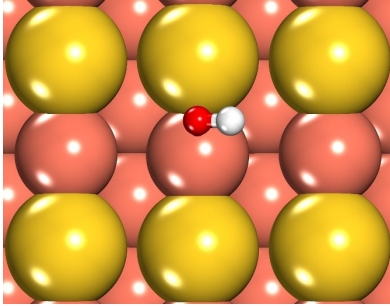

(d) OH

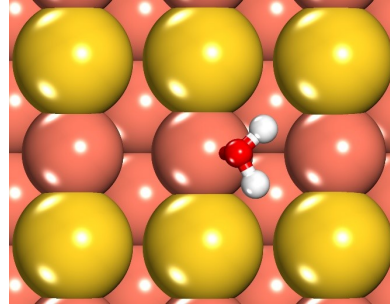

(e) H<sub>2</sub>O

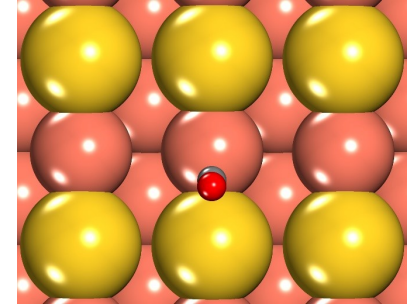

(f) CO

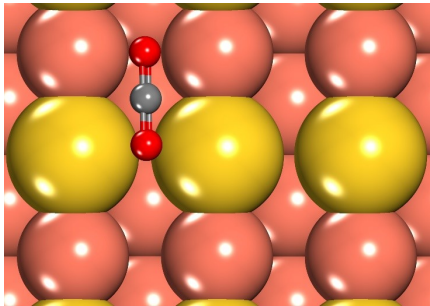

(g) CO<sub>2</sub>

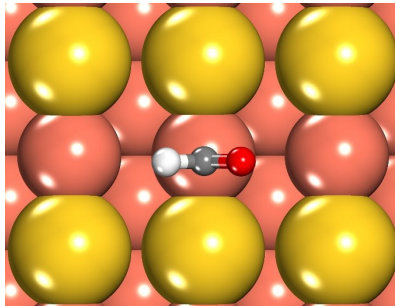

(h) CHO

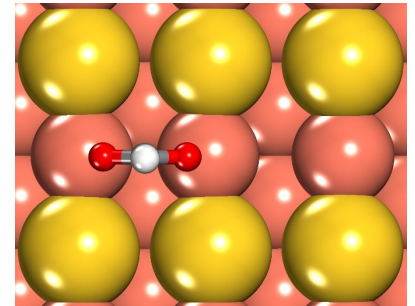

(i) bi-HCOO

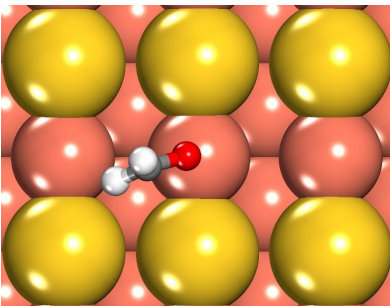

(j) mono-H<sub>2</sub>CO

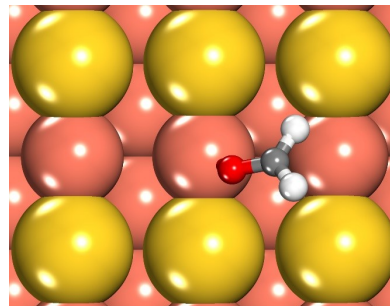

(k) bi-H<sub>2</sub>CO

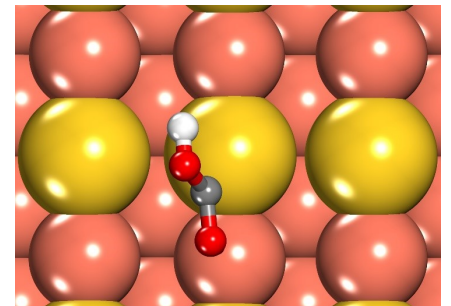

(l) trans-COOH

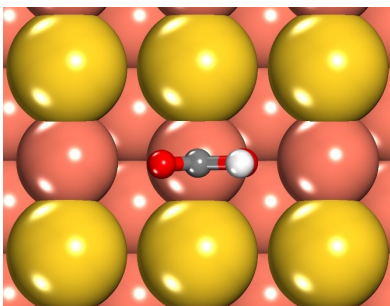

(m) cis-COOH

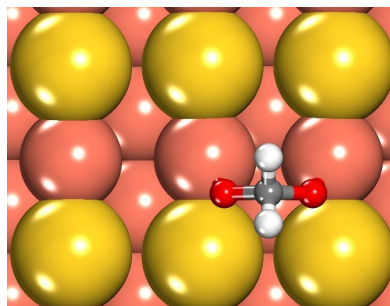

(n) H<sub>2</sub>COO

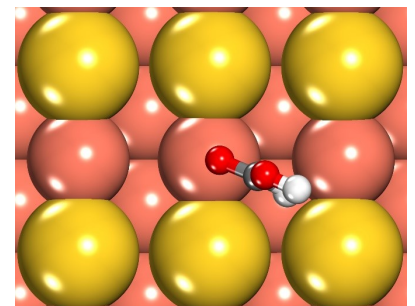

(o) HCOOH

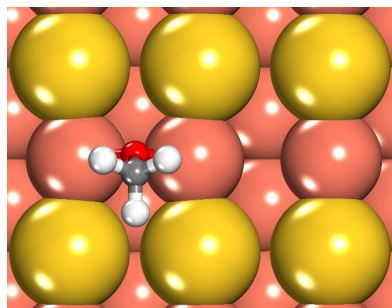

(p) CH<sub>3</sub>O

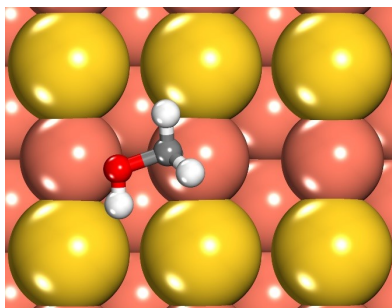

(q) CH<sub>2</sub>OH

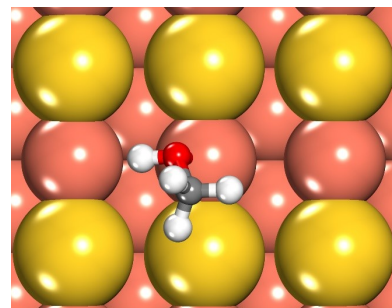

(r) CH<sub>3</sub>OH

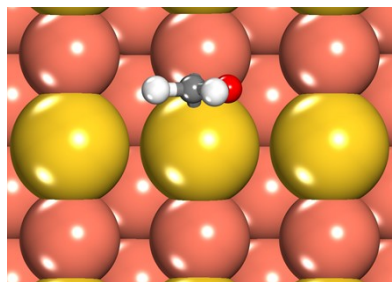

(s) CHO

Fig. S3. Optimal configurations of reaction intermediates adsorbed on Au-Cu substrate, containing (a) H\*, (b) O\*, (c) H<sub>2</sub>\*, (d) OH\*, (e) H<sub>2</sub>O\*, (f) CO\*, (g) CO<sub>2</sub>\*, (h) CHO\*, (i) bi-HCOO\*, (j) mono-H<sub>2</sub>CO\*, (k) bi-H<sub>2</sub>CO\*, (l) trans-COOH\*, (m) cis-COOH\*, (n) H<sub>2</sub>COO\*, (o) HCOOH\*, (p) CH<sub>3</sub>O\*, (q) CH<sub>2</sub>OH\*, (r) CH<sub>3</sub>OH\* and (s) CHO.



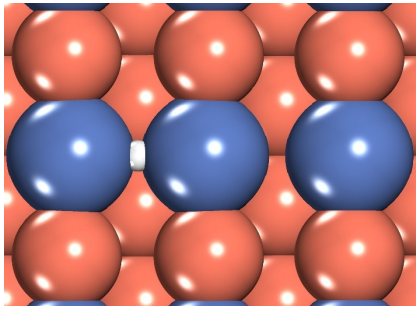

(a) H

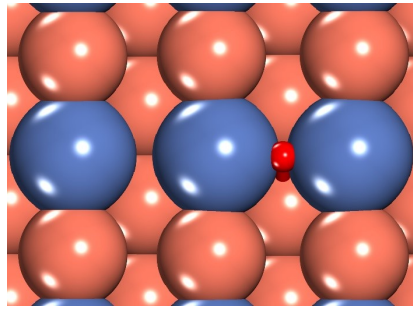

(b) O

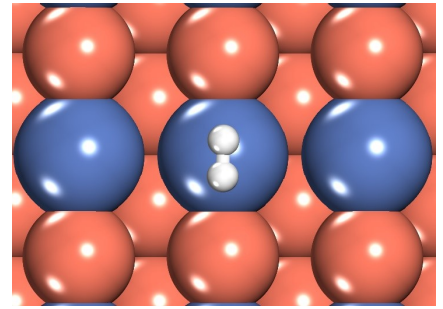

(c) H<sub>2</sub>

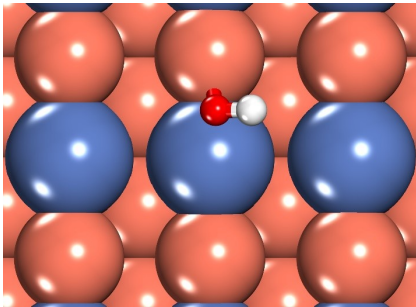

(d) OH

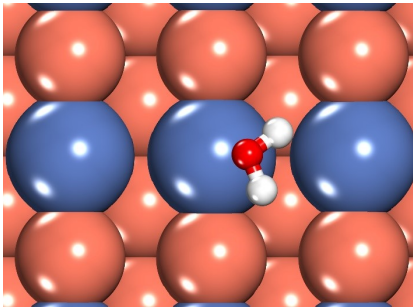

(e) H<sub>2</sub>O

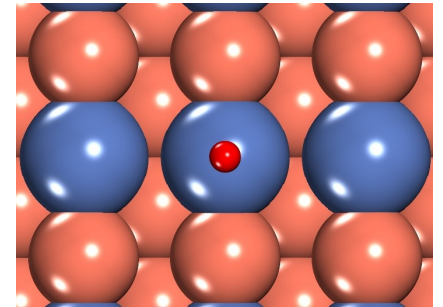

(f) CO

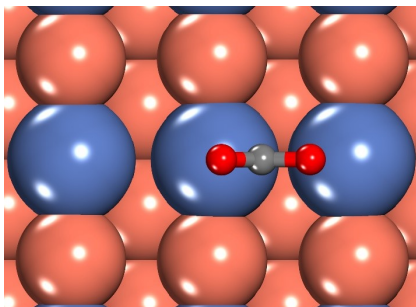

(g) CO<sub>2</sub>

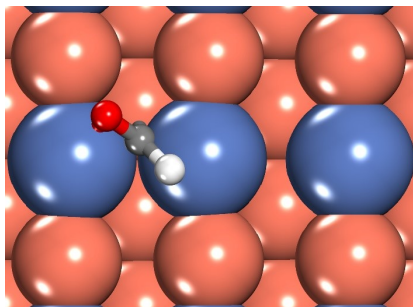

(h) CHO

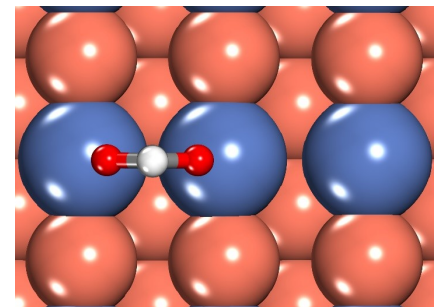

(i) bi-HCOO

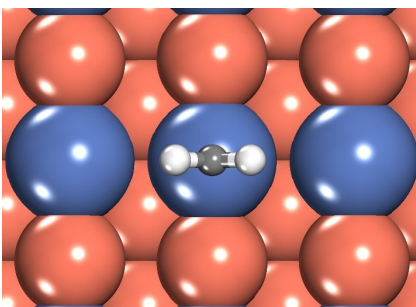

(j) mono-H<sub>2</sub>CO

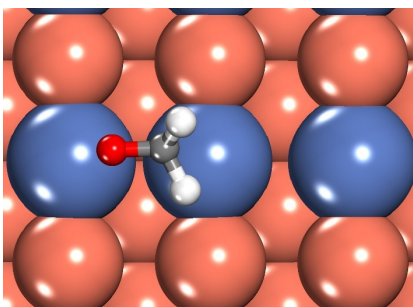

(k) bi-H<sub>2</sub>CO

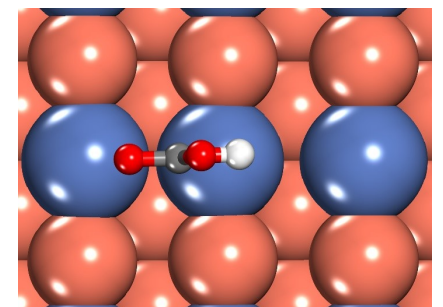

(l) trans-COOH

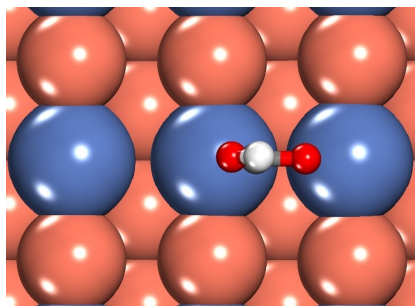

(m) cis-COOH

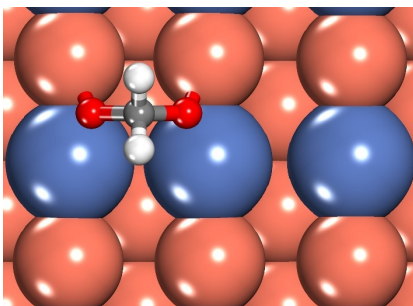

(n) H<sub>2</sub>COO

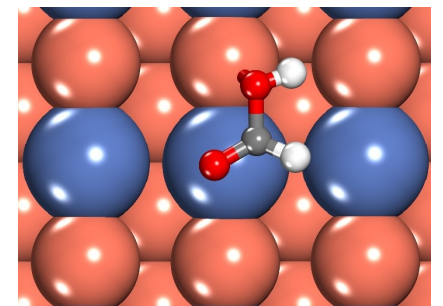

(o) HCOOH

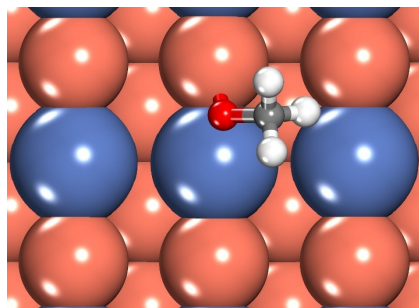

(p) CH<sub>3</sub>O

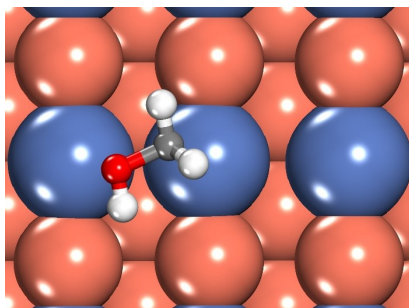

(q) CH<sub>2</sub>OH

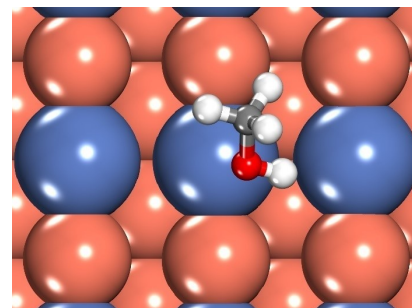

(r) CH<sub>3</sub>OH

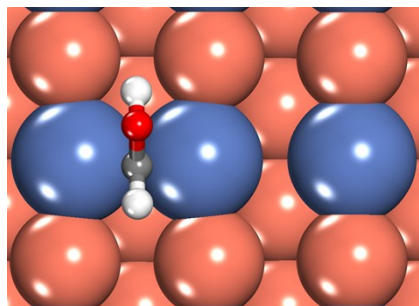

(s) CHOH

Fig. S4. Optimal configurations of reaction intermediates adsorbed on Ni-Cu substrate, containing (a) H\*, (b) O\*, (c) H<sub>2</sub>\*, (d) OH\*, (e) H<sub>2</sub>O\*, (f) CO\*, (g) CO<sub>2</sub>\*, (h) CHO\*, (i) bi-HCOO\*, (j) mono-H<sub>2</sub>CO\*, (k) bi-H<sub>2</sub>CO\*, (l) trans-COOH\*, (m) cis-COOH\*, (n) H<sub>2</sub>COO\*, (o) HCOOH\*, (p) CH<sub>3</sub>O\*, (q) CH<sub>2</sub>OH\*, (r) CH<sub>3</sub>OH\* and (s) CHOH.



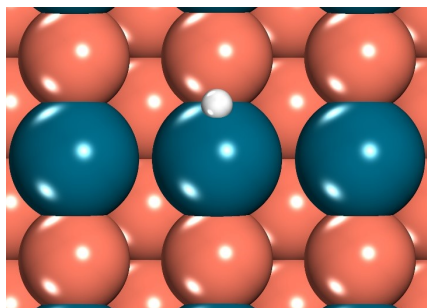

(a) H

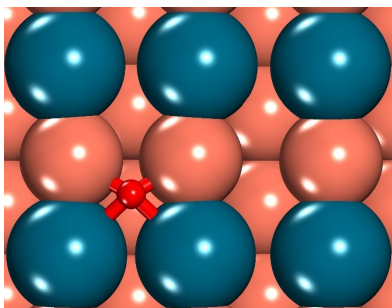

(b) O

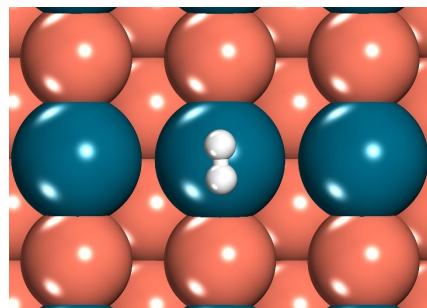

(c) H<sub>2</sub>

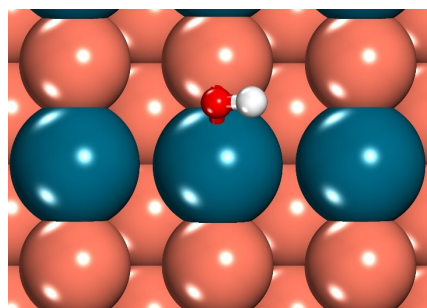

(d) OH

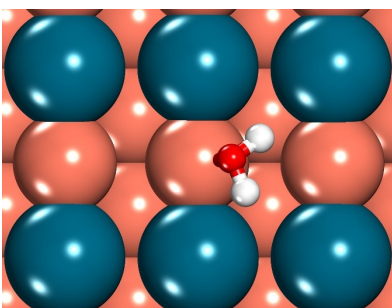

(e) H<sub>2</sub>O

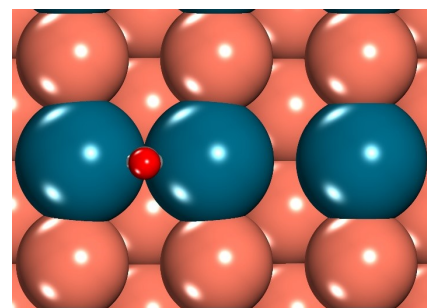

(f) CO

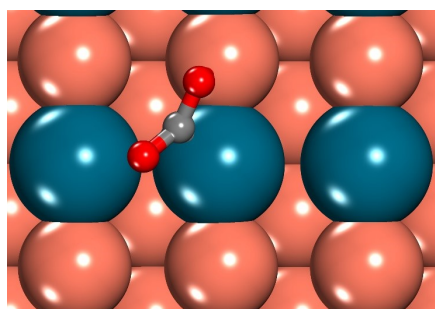

(g) CO<sub>2</sub>

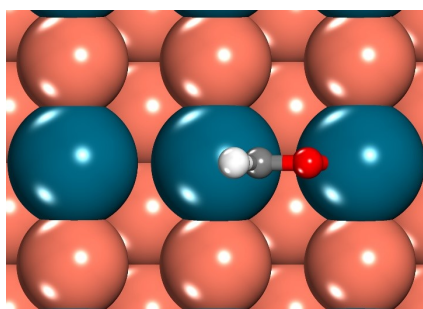

(h) CHO

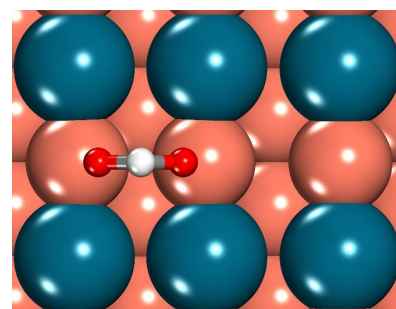

(i) bi-HCOO

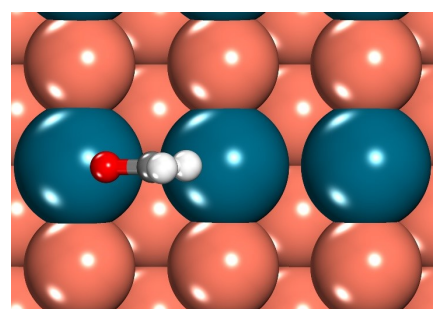

(j) mono-H<sub>2</sub>CO

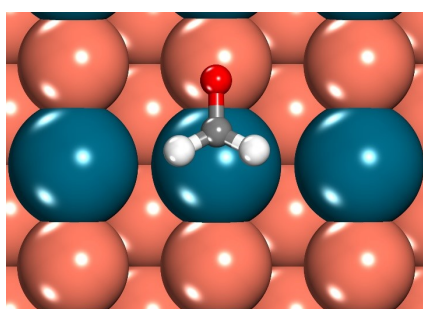

(k) bi-H<sub>2</sub>CO

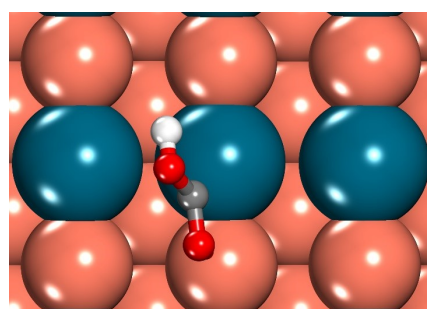

(l) trans-COOH

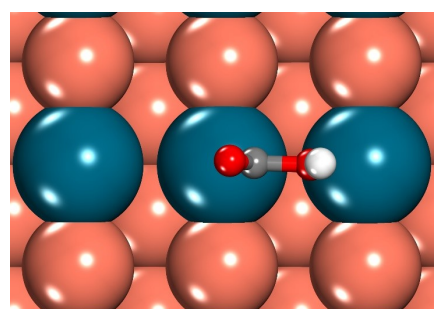

(m) cis-COOH

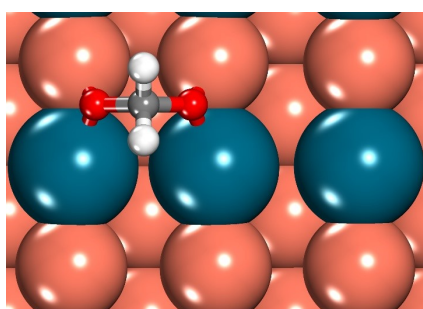

(n) H<sub>2</sub>COO

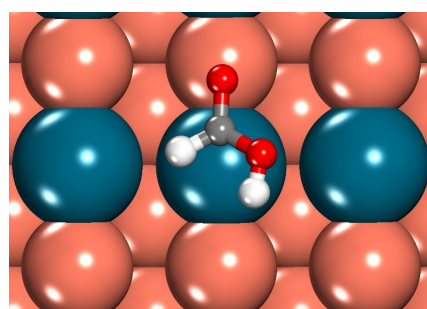

(o) HCOOH

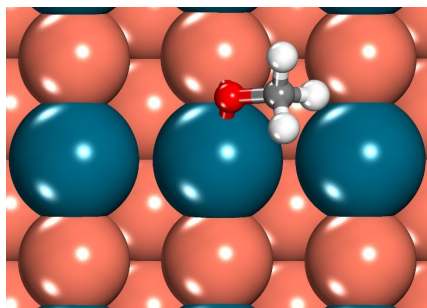

(p) CH<sub>3</sub>O

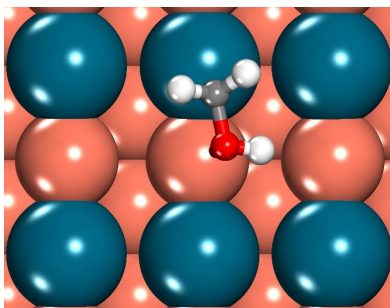

(q) CH<sub>2</sub>OH

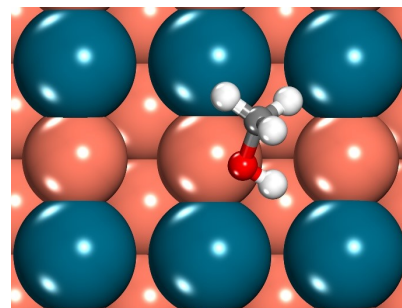

(r) CH<sub>3</sub>OH

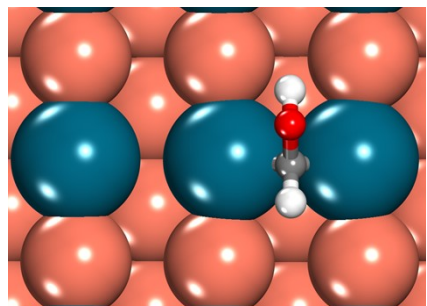

(s) CHOH

Fig. S5. Optimal configurations of reaction intermediates adsorbed on Pd-Cu substrate, containing (a) H\*, (b) O\*, (c) H<sub>2</sub>\*, (d) OH\*, (e) H<sub>2</sub>O\*, (f) CO\*, (g) CO<sub>2</sub>\*, (h) CHO\*, (i) bi-HCOO\*, (j) mono-H<sub>2</sub>CO\*, (k) bi-H<sub>2</sub>CO\*, (l) trans-COOH\*, (m) cis-COOH\*, (n) H<sub>2</sub>COO\*, (o) HCOOH\*, (p) CH<sub>3</sub>O\*, (q) CH<sub>2</sub>OH\*, (r) CH<sub>3</sub>OH\* and (s) CHOH.



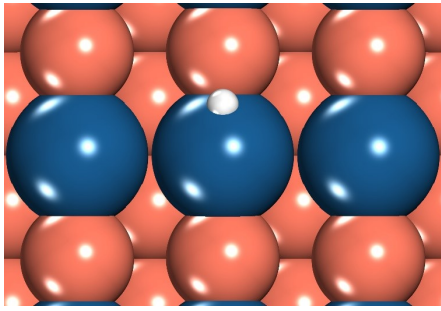

(a) H

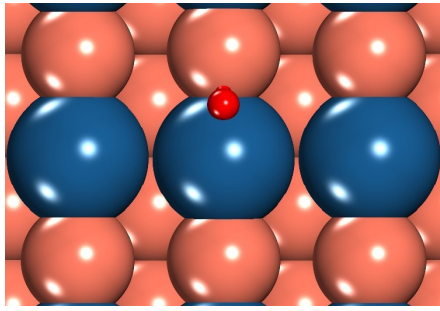

(b) O

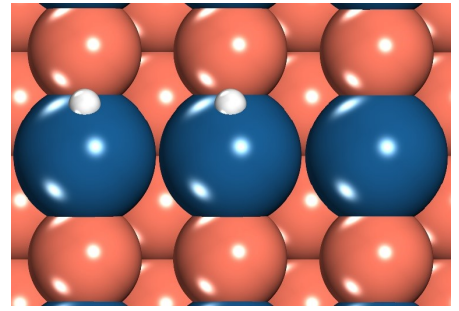

(c) H<sub>2</sub>

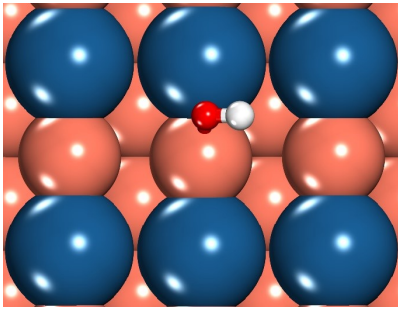

(d) OH

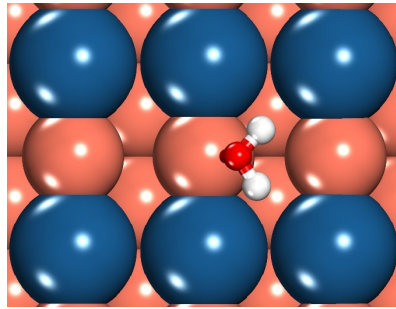

(e) H<sub>2</sub>O

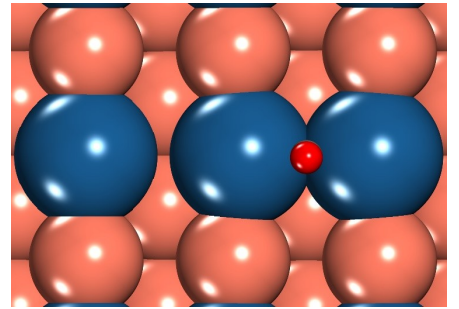

(f) CO

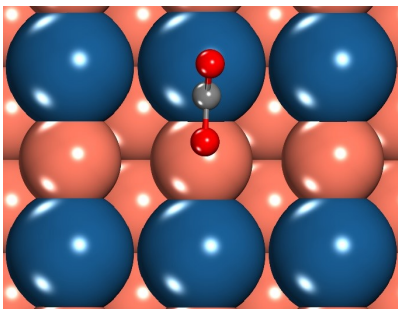

(g) CO<sub>2</sub>

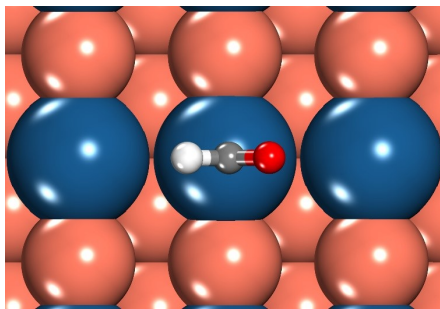

(h) CHO

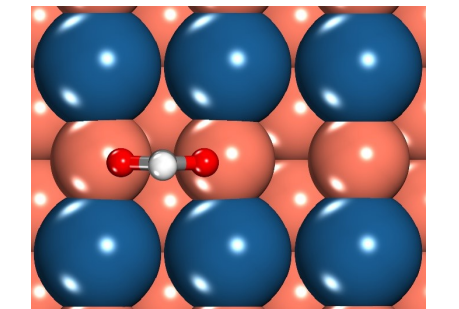

(i) bi-HCOO

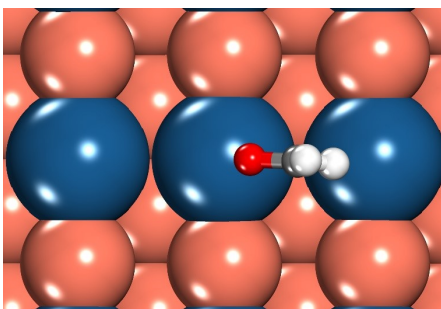

(j) mono-H<sub>2</sub>CO

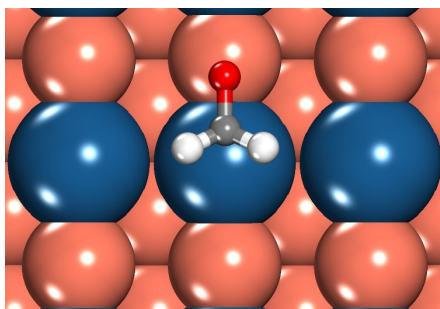

(k) bi-H<sub>2</sub>CO

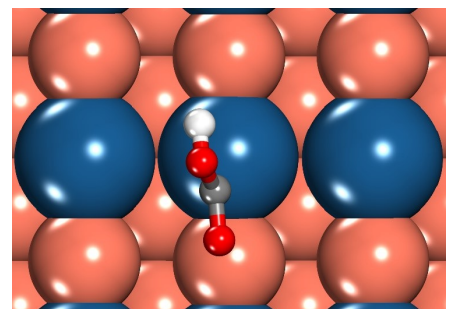

(l) trans-COOH

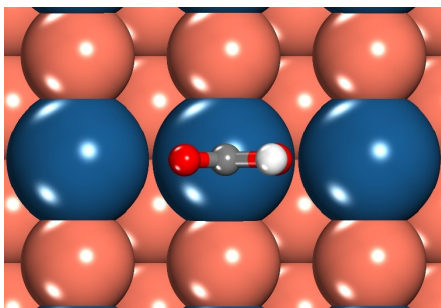

(m) cis-COOH

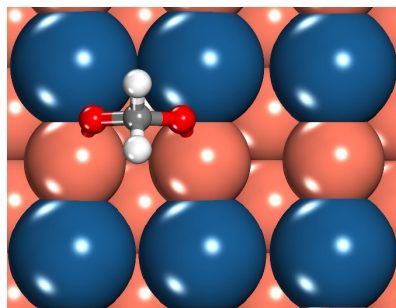

(n) H<sub>2</sub>COO

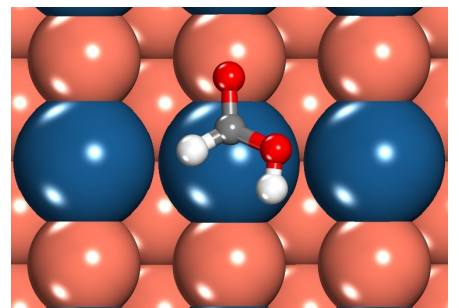

(o) HCOOH

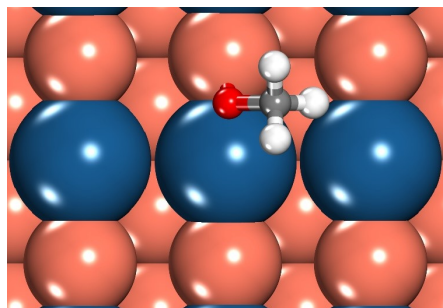

(p)  $\text{CH}_3\text{O}$

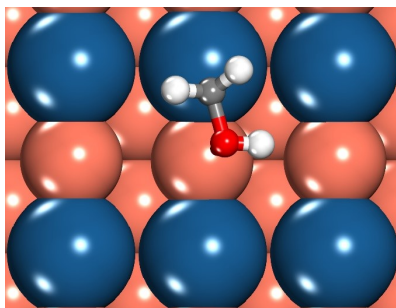

(q)  $\text{CH}_2\text{OH}$

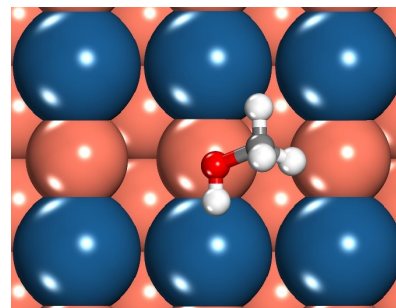

(r)  $\text{CH}_3\text{OH}$

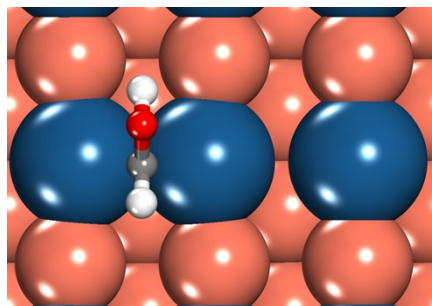

(s)  $\text{CHOH}$

Fig. S6. Optimal configurations of reaction intermediates adsorbed on Pt-Cu substrate, containing (a)  $\text{H}^*$ , (b)  $\text{O}^*$ , (c)  $\text{H}_2^*$ , (d)  $\text{OH}^*$ , (e)  $\text{H}_2\text{O}^*$ , (f)  $\text{CO}^*$ , (g)  $\text{CO}_2^*$ , (h)  $\text{CHO}^*$ , (i) bi- $\text{HCOO}^*$ , (j) mono- $\text{H}_2\text{CO}^*$ , (k) bi- $\text{H}_2\text{CO}^*$ , (l) trans- $\text{COOH}^*$ , (m) cis- $\text{COOH}^*$ , (n)  $\text{H}_2\text{COO}^*$ , (o)  $\text{HCOOH}^*$ , (p)  $\text{CH}_3\text{O}^*$ , (q)  $\text{CH}_2\text{OH}^*$ , (r)  $\text{CH}_3\text{OH}^*$  and (s)  $\text{CHOH}$ .



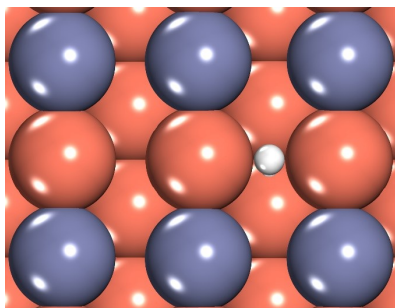

(a) H

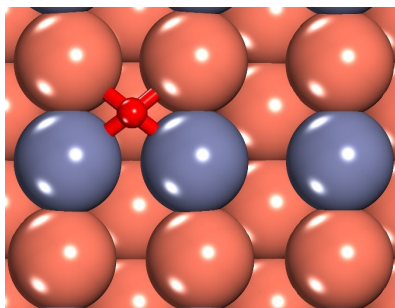

(b) O

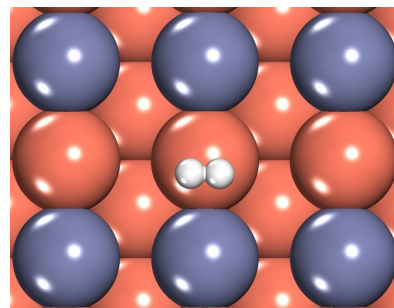

(c) H<sub>2</sub>

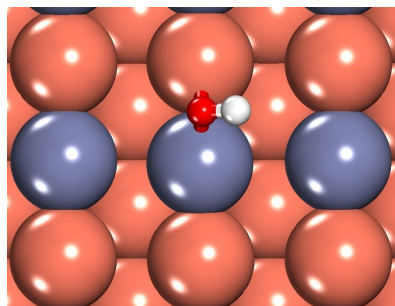

(d) OH

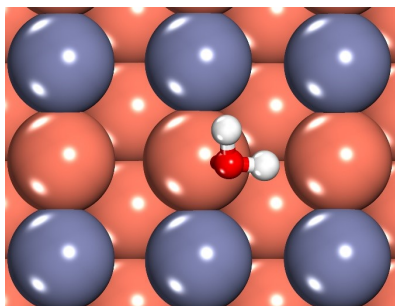

(e) H<sub>2</sub>O

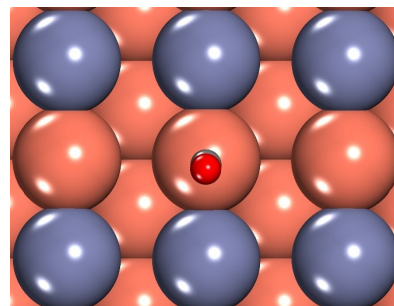

(f) CO

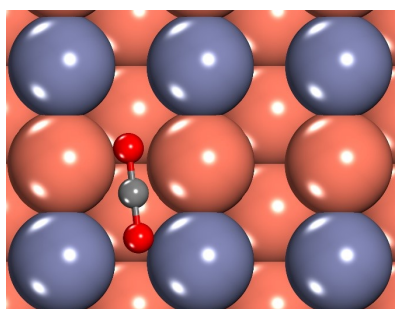

(g) CO<sub>2</sub>

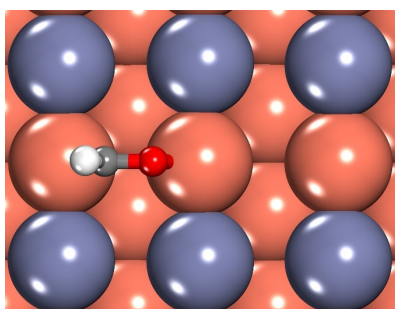

(h) CHO

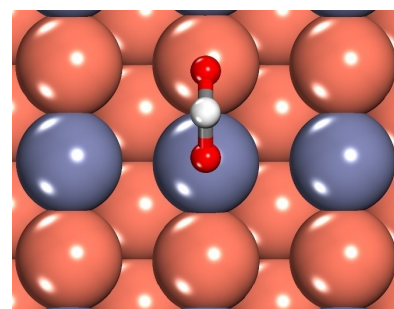

(i) bi-HCOO

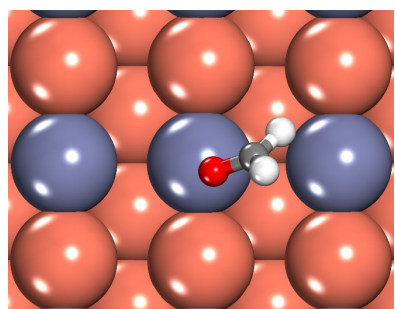

(j) mono-H<sub>2</sub>CO

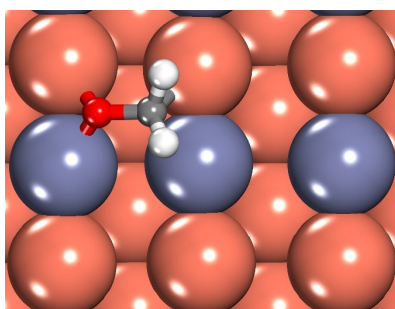

(k) bi-H<sub>2</sub>CO

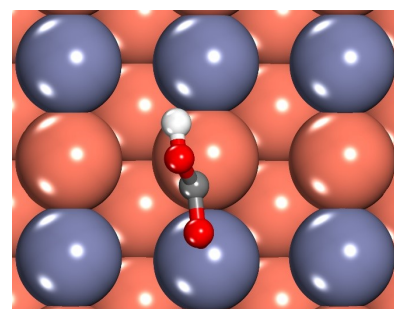

(l) trans-COOH

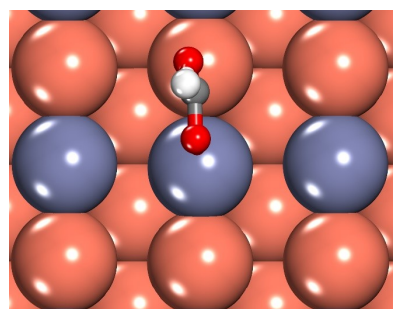

(m) cis-COOH

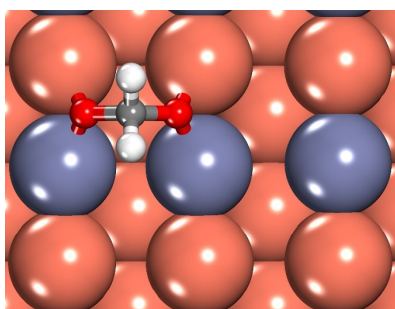

(n) H<sub>2</sub>COO

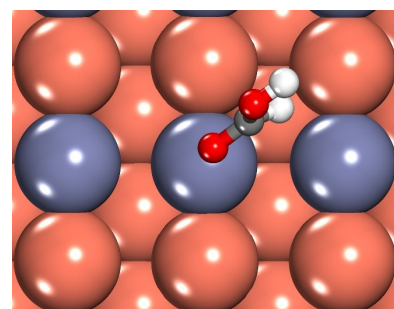

(o) HCOOH

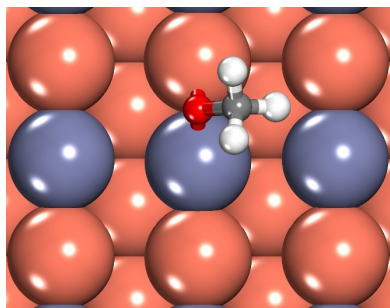

(p) CH<sub>3</sub>O

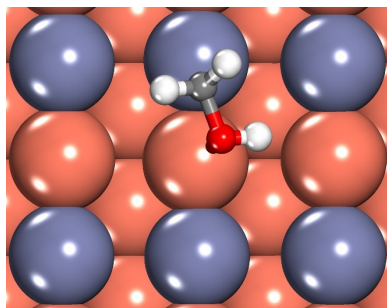

(q) CH<sub>2</sub>OH

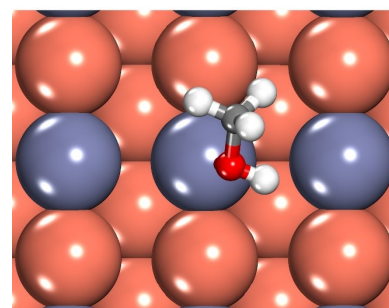

(r) CH<sub>3</sub>OH

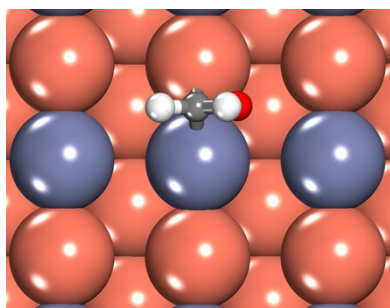

(s) CHOH

Fig. S7. Optimal configurations of reaction intermediates adsorbed on Zn-Cu substrate, containing (a) H\*, (b) O\*, (c) H<sub>2</sub>\*, (d) OH\*, (e) H<sub>2</sub>O\*, (f) CO\*, (g) CO<sub>2</sub>\*, (h) CHO\*, (i) bi-HCOO\*, (j) mono-H<sub>2</sub>CO\*, (k) bi-H<sub>2</sub>CO\*, (l) trans-COOH\*, (m) cis-COOH\*, (n) H<sub>2</sub>COO\*, (o) HCOOH\*, (p) CH<sub>3</sub>O\*, (q) CH<sub>2</sub>OH\*, (r) CH<sub>3</sub>OH\* and (s) CHOH.



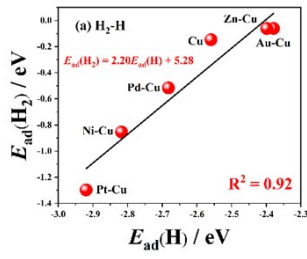(a)  $H_2 \sim H$ 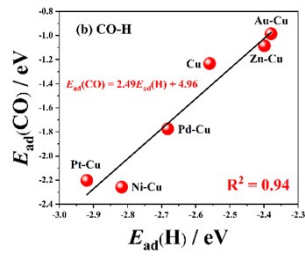(b)  $CO \sim H$ 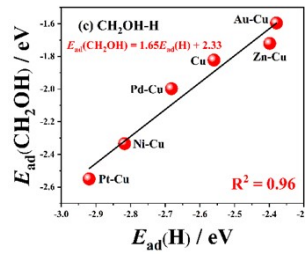(c)  $CH_2OH \sim H$ 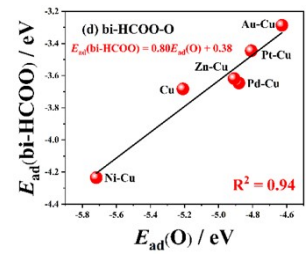(d)  $bi-HCOO \sim O$ 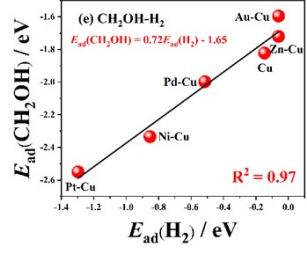(e)  $CH_2OH \sim H_2$ 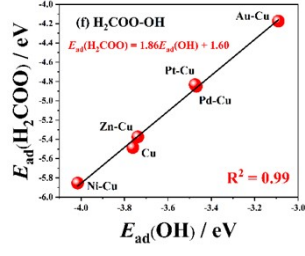(f)  $H_2COO \sim OH$ 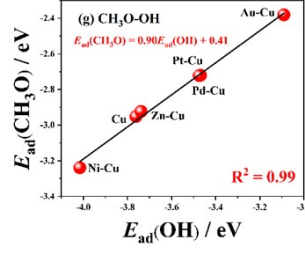(g)  $CH_3O \sim OH$ 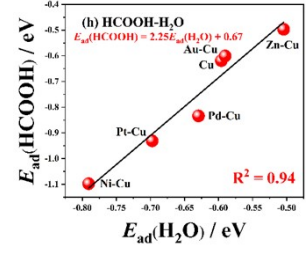(h)  $HCOOH \sim H_2O$ 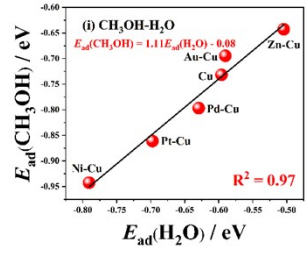(i)  $CH_3OH \sim H_2O$ 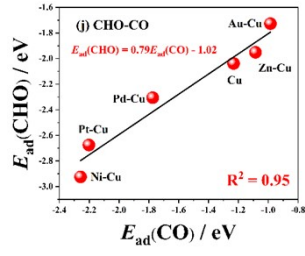(j)  $CHO \sim CO$ 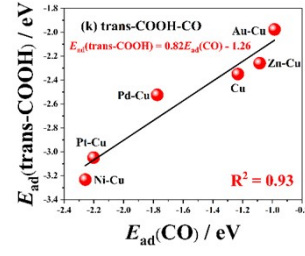(k)  $trans-COOH \sim CO$ 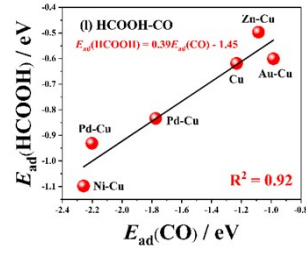(l)  $HCOOH \sim CO$ 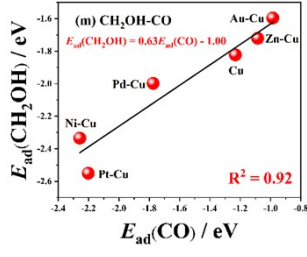(m)  $CH_2OH \sim CO$ 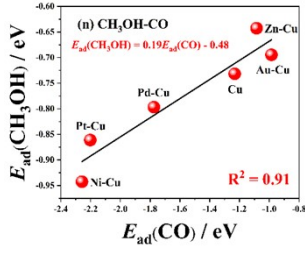(n)  $CH_3OH \sim CO$ 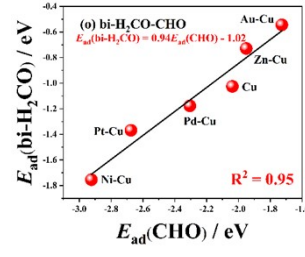(o)  $bi-H_2CO \sim CHO$ 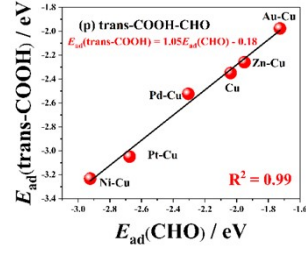(p)  $trans-COOH \sim CHO$ 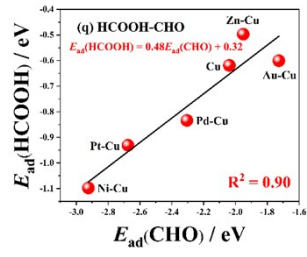(q)  $HCOOH \sim CHO$ 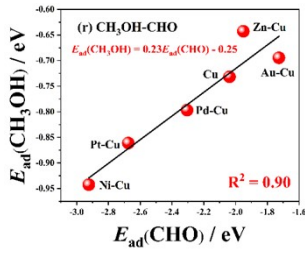(r)  $CH_3OH \sim CHO$ 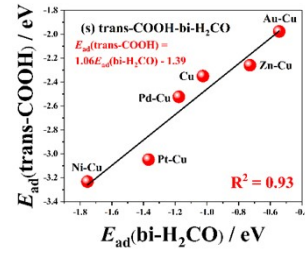(s)  $trans-COOH \sim bi-H_2CO$ 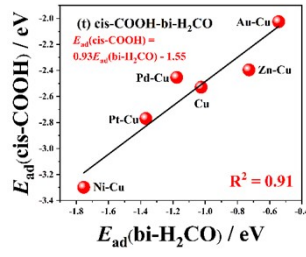(t)  $cis-COOH \sim bi-H_2CO$ 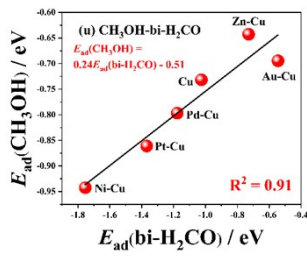(u)  $CH_3OH \sim bi-H_2CO$ 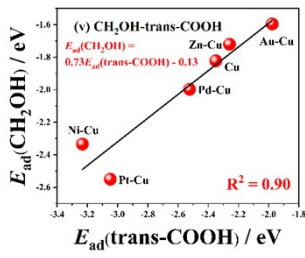(v)  $CH_2OH \sim trans-COOH$ 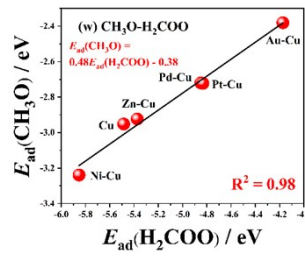(w)  $CH_3O \sim H_2COO$ 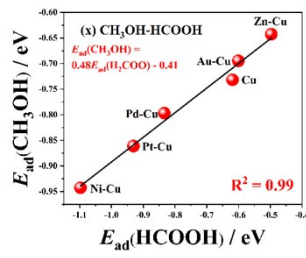(x)  $CH_3OH \sim HCOOH$

Fig. S8. Highly correlated scaling relationships of adsorption energy between different reaction intermediates (greater than 0.9) during methanol synthesis, including (a)  $H_2 \sim H$ , (b)  $CO \sim H$ , (c)  $CH_2OH \sim H$ , (d)  $bi-HCOO \sim O$ , (e)  $CH_2OH \sim H_2$ , (f)  $H_2COO \sim OH$ , (g)  $CH_3O \sim OH$ , (h)  $HCOOH \sim H_2O$ , (i)  $CH_3OH \sim H_2O$ , (j)  $CHO \sim CO$ , (k)  $trans-COOH \sim CO$ , (l)  $HCOOH \sim CO$ , (m)  $CH_2OH \sim CO$ , (n)  $CH_3OH \sim CO$ , (o)  $bi-H_2CO \sim CHO$ , (p)  $trans-COOH \sim CHO$ , (q)  $HCOOH \sim CHO$ , (r)  $CH_3OH \sim CHO$ , (s)  $trans-COOH \sim bi-H_2CO$ , (t)  $cis-COOH \sim bi-H_2CO$ , (u)  $CH_3OH \sim bi-H_2CO$ , (v)  $CH_2OH \sim trans-COOH$ , (w)  $CH_3O \sim H_2COO$  and (x)  $CH_3OH \sim HCOOH$ .

## 2. Table captions

Table S1. Summary of determination coefficients for adsorption energy between different intermediate descriptors on Cu-based substrates.

| Intermediate Pairing       | R <sup>2</sup> | Intermediate Pairing       | R <sup>2</sup> | Intermediate Pairing                    | R <sup>2</sup> | Intermediate Pairing        | R <sup>2</sup> | Intermediate Pairing                      | R <sup>2</sup> | Intermediate Pairing        | R <sup>2</sup> | Intermediate Pairing                     | R <sup>2</sup> |
|----------------------------|----------------|----------------------------|----------------|-----------------------------------------|----------------|-----------------------------|----------------|-------------------------------------------|----------------|-----------------------------|----------------|------------------------------------------|----------------|
| O ~ H                      | 0.16           | H <sub>2</sub> ~ O         | 0.06           | OH ~ H <sub>2</sub>                     | 0.03           | H <sub>2</sub> O ~ OH       | 0.13           | CO ~ H <sub>2</sub> O                     | 0.79           | CO <sub>2</sub> ~ CO        | 0.77           | CHO ~ CO <sub>2</sub>                    | 0.87           |
| H <sub>2</sub> ~ H         | 0.92           | OH ~ O                     | 0.79           | H <sub>2</sub> O ~ H <sub>2</sub>       | 0.62           | CO ~ OH                     | 0.16           | CO <sub>2</sub> ~ H <sub>2</sub> O        | 0.88           | CHO ~ CO                    | 0.95           | bi-HCOO ~ CO <sub>2</sub>                | 0.56           |
| OH ~ H                     | 0.11           | H <sub>2</sub> O ~ O       | 0.40           | CO ~ H <sub>2</sub>                     | 0.88           | CO <sub>2</sub> ~ OH        | 0.27           | CHO ~ H <sub>2</sub> O                    | 0.80           | bi-HCOO ~ CO                | 0.29           | mono-H <sub>2</sub> CO ~ CO <sub>2</sub> | 0.87           |
| H <sub>2</sub> O ~ H       | 0.70           | CO ~ O                     | 0.24           | CO <sub>2</sub> ~ H <sub>2</sub>        | 0.55           | CHO ~ OH                    | 0.32           | bi-HCOO ~ H <sub>2</sub> O                | 0.38           | mono-H <sub>2</sub> CO ~ CO | 0.61           | bi-H <sub>2</sub> CO ~ CO <sub>2</sub>   | 0.82           |
| CO ~ H                     | 0.94           | CO <sub>2</sub> ~ O        | 0.51           | CHO ~ H <sub>2</sub>                    | 0.78           | bi-HCOO ~ OH                | 0.78           | mono-H <sub>2</sub> CO ~ H <sub>2</sub> O | 0.73           | bi-H <sub>2</sub> CO ~ CO   | 0.88           | trans-COOH ~ CO <sub>2</sub>             | 0.83           |
| CO <sub>2</sub> ~ H        | 0.60           | CHO ~ O                    | 0.41           | bi-HCOO ~ H <sub>2</sub>                | 0.06           | mono-H <sub>2</sub> CO ~ OH | 0.08           | bi-H <sub>2</sub> CO ~ H <sub>2</sub> O   | 0.81           | trans-COOH ~ CO             | 0.93           | cis-COOH ~ CO <sub>2</sub>               | 0.83           |
| CHO ~ H                    | 0.86           | bi-HCOO ~ O                | 0.94           | mono-H <sub>2</sub> CO ~ H <sub>2</sub> | 0.41           | bi-H <sub>2</sub> CO ~ OH   | 0.41           | trans-COOH ~ H <sub>2</sub> O             | 0.77           | cis-COOH ~ CO               | 0.71           | H <sub>2</sub> COO ~ CO <sub>2</sub>     | 0.23           |
| bi-HCOO ~ H                | 0.17           | mono-H <sub>2</sub> CO ~ O | 0.27           | bi-H <sub>2</sub> CO ~ H <sub>2</sub>   | 0.64           | trans-COOH ~ OH             | 0.33           | cis-COOH ~ H <sub>2</sub> O               | 0.69           | H <sub>2</sub> COO ~ CO     | 0.12           | HCOOH ~ CO <sub>2</sub>                  | 0.88           |
| mono-H <sub>2</sub> CO ~ H | 0.39           | bi-H <sub>2</sub> CO ~ O   | 0.56           | trans-COOH ~ H <sub>2</sub>             | 0.80           | cis-COOH ~ OH               | 0.63           | H <sub>2</sub> COO ~ H <sub>2</sub> O     | 0.10           | HCOOH ~ CO                  | 0.92           | CH <sub>3</sub> O ~ CO <sub>2</sub>      | 0.35           |
| bi-H <sub>2</sub> CO ~ H   | 0.81           | trans-COOH ~ O             | 0.40           | cis-COOH ~ H <sub>2</sub>               | 0.48           | H <sub>2</sub> COO ~ OH     | 0.99           | HCOOH ~ H <sub>2</sub> O                  | 0.94           | CH <sub>3</sub> O ~ CO      | 0.20           | CH <sub>2</sub> OH ~ CO <sub>2</sub>     | 0.62           |
| trans-COOH ~ H             | 0.87           | cis-COOH ~ O               | 0.73           | H <sub>2</sub> COO ~ H <sub>2</sub>     | 0.02           | HCOOH ~ OH                  | 0.13           | CH <sub>3</sub> O ~ H <sub>2</sub> O      | 0.18           | CH <sub>2</sub> OH ~ CO     | 0.92           | CH <sub>3</sub> OH ~ CO <sub>2</sub>     | 0.88           |
| cis-COOH ~ H               | 0.61           | H <sub>2</sub> COO ~ O     | 0.78           | HCOOH ~ H <sub>2</sub>                  | 0.73           | CH <sub>3</sub> O ~ OH      | 0.99           | CH <sub>2</sub> OH ~ H <sub>2</sub> O     | 0.65           | CH <sub>3</sub> OH ~ CO     | 0.91           |                                          |                |

|                        |      |                        |      |                                     |      |                         |      |                                       |      |
|------------------------|------|------------------------|------|-------------------------------------|------|-------------------------|------|---------------------------------------|------|
| H <sub>2</sub> COO ~ H | 0.09 | HCOOH ~ O              | 0.33 | CH <sub>3</sub> O ~ H <sub>2</sub>  | 0.05 | CH <sub>2</sub> OH ~ OH | 0.12 | CH <sub>3</sub> OH ~ H <sub>2</sub> O | 0.97 |
| HCOOH ~ H              | 0.81 | CH <sub>3</sub> O ~ O  | 0.84 | CH <sub>2</sub> OH ~ H <sub>2</sub> | 0.97 | CH <sub>3</sub> OH ~ OH | 0.16 |                                       |      |
| CH <sub>3</sub> O ~ H  | 0.15 | CH <sub>2</sub> OH ~ O | 0.14 | CH <sub>3</sub> OH ~ H <sub>2</sub> | 0.72 |                         |      |                                       |      |
| CH <sub>2</sub> OH ~ H | 0.96 | CH <sub>3</sub> OH ~ O | 0.38 |                                     |      |                         |      |                                       |      |
| CH <sub>3</sub> OH ~ H | 0.83 |                        |      |                                     |      |                         |      |                                       |      |

*Continue*

| Intermediate Pairing         | R <sup>2</sup> | Intermediate Pairing             | R <sup>2</sup> | Intermediate Pairing                          | R <sup>2</sup> | Intermediate Pairing                      | R <sup>2</sup> | Intermediate Pairing            | R <sup>2</sup> | Intermediate Pairing           | R <sup>2</sup> |
|------------------------------|----------------|----------------------------------|----------------|-----------------------------------------------|----------------|-------------------------------------------|----------------|---------------------------------|----------------|--------------------------------|----------------|
| bi-HCOO ~ CHO                | 0.46           | mono-H <sub>2</sub> CO ~ bi-HCOO | 0.38           | bi-H <sub>2</sub> CO ~ mono-H <sub>2</sub> CO | 0.56           | trans-COOH ~ bi-H <sub>2</sub> CO         | 0.93           | cis-COOH ~ trans-COOH           | 0.88           | H <sub>2</sub> COO ~ cis-COOH- | 0.57           |
| mono-H <sub>2</sub> CO ~ CHO | 0.64           | bi-H <sub>2</sub> CO ~ bi-HCOO   | 0.58           | trans-COOH ~ mono-H <sub>2</sub> CO           | 0.57           | cis-COOH ~ bi-H <sub>2</sub> CO           | 0.91           | H <sub>2</sub> COO ~ trans-COOH | 0.28           | HCOOH ~ cis-COOH-              | 0.70           |
| bi-H <sub>2</sub> CO ~ CHO   | 0.95           | trans-COOH ~ bi-HCOO             | 0.43           | cis-COOH ~ mono-H <sub>2</sub> CO             | 0.51           | H <sub>2</sub> COO ~ bi-H <sub>2</sub> CO | 0.36           | HCOOH ~ trans-COOH              | 0.85           | CH <sub>3</sub> O ~ cis-COOH-  | 0.69           |
| trans-COOH ~ CHO             | 0.99           | cis-COOH ~ bi-HCOO               | 0.73           | H <sub>2</sub> COO ~ mono-H <sub>2</sub> CO   | 0.05           | HCOOH ~ bi-H <sub>2</sub> CO              | 0.87           | CH <sub>3</sub> O ~ trans-COOH  | 0.39           | CH <sub>2</sub> OH ~ cis-COOH- | 0.63           |
| cis-COOH ~ CHO               | 0.88           | H <sub>2</sub> COO ~ bi-HCOO     | 0.76           | HCOOH ~ mono-H <sub>2</sub> CO                | 0.77           | CH <sub>3</sub> O ~ bi-H <sub>2</sub> CO  | 0.48           | CH <sub>2</sub> OH ~ trans-COOH | 0.90           | CH <sub>3</sub> OH ~ cis-COOH- | 0.75           |
| H <sub>2</sub> COO ~ CHO     | 0.26           | HCOOH ~ bi-HCOO                  | 0.37           | CH <sub>3</sub> O ~ mono-H <sub>2</sub> CO    | 0.13           | CH <sub>2</sub> OH ~ bi-H <sub>2</sub> CO | 0.76           | CH <sub>3</sub> OH ~ trans-COOH | 0.87           |                                |                |
| HCOOH ~ CHO                  | 0.90           | CH <sub>3</sub> O ~ bi-HCOO      | 0.84           | CH <sub>2</sub> OH ~ mono-H <sub>2</sub> CO   | 0.41           | CH <sub>3</sub> OH ~ bi-H <sub>2</sub> CO | 0.91           |                                 |                |                                |                |



|                          |      |                              |      |                                             |      |
|--------------------------|------|------------------------------|------|---------------------------------------------|------|
| CH <sub>3</sub> O ~ CHO  | 0.38 | CH <sub>2</sub> OH ~ bi-HCOO | 0.15 | CH <sub>3</sub> OH ~ mono-H <sub>2</sub> CO | 0.70 |
| CH <sub>2</sub> OH ~ CHO | 0.87 | CH <sub>3</sub> OH ~ bi-HCOO | 0.24 |                                             |      |
| CH <sub>3</sub> OH ~ CHO | 0.90 |                              |      |                                             |      |

*Continue*

| Intermediate Pairing                    | R <sup>2</sup> | Intermediate Pairing       | R <sup>2</sup> | Intermediate Pairing                    | R <sup>2</sup> | Intermediate Pairing                    | R <sup>2</sup> |
|-----------------------------------------|----------------|----------------------------|----------------|-----------------------------------------|----------------|-----------------------------------------|----------------|
| HCOOH ~ H <sub>2</sub> COO              | 0.10           | CH <sub>3</sub> O ~ HCOOH  | 0.18           | CH <sub>2</sub> OH ~ CH <sub>3</sub> O- | 0.16           | CH <sub>3</sub> OH ~ CH <sub>2</sub> OH | 0.77           |
| CH <sub>3</sub> O ~ H <sub>2</sub> COO  | 0.98           | CH <sub>2</sub> OH ~ HCOOH | 0.76           | CH <sub>3</sub> OH ~ CH <sub>3</sub> O- | 0.22           |                                         |                |
| CH <sub>2</sub> OH ~ H <sub>2</sub> COO | 0.09           | CH <sub>3</sub> OH ~ HCOOH | 0.99           |                                         |                |                                         |                |
| CH <sub>3</sub> OH ~ H <sub>2</sub> COO | 0.13           |                            |                |                                         |                |                                         |                |

Table S2. Summary of average determination coefficients for adsorption energy between dual intermediate descriptors and all intermediates involved in CO<sub>2</sub> hydrogenation.

| IM combination           | R <sup>2</sup> | IM combination           | R <sup>2</sup> | IM combination                        | R <sup>2</sup> | IM combination            | R <sup>2</sup> | IM combination                          | R <sup>2</sup> | IM combination            | R <sup>2</sup> |
|--------------------------|----------------|--------------------------|----------------|---------------------------------------|----------------|---------------------------|----------------|-----------------------------------------|----------------|---------------------------|----------------|
| H&H                      | 0.61           | H&O                      | 0.68           | H&H <sub>2</sub>                      | 0.57           | H&OH                      | 0.63           | H&H <sub>2</sub> O                      | 0.66           | H&CO                      | 0.67           |
| O&H                      | 0.68           | O&O                      | 0.50           | O&H <sub>2</sub>                      | 0.74           | O&OH                      | 0.48           | O&H <sub>2</sub> O                      | 0.57           | O&CO                      | 0.74           |
| H <sub>2</sub> &H        | 0.57           | H <sub>2</sub> &O        | 0.74           | H <sub>2</sub> &H <sub>2</sub>        | 0.54           | H <sub>2</sub> &OH        | 0.68           | H <sub>2</sub> &H <sub>2</sub> O        | 0.59           | H <sub>2</sub> &CO        | 0.63           |
| OH&H                     | 0.63           | OH&O                     | 0.48           | OH&H <sub>2</sub>                     | 0.68           | OH&OH                     | 0.41           | OH&H <sub>2</sub> O                     | 0.55           | OH&CO                     | 0.72           |
| H <sub>2</sub> O&H       | 0.66           | H <sub>2</sub> O&O       | 0.57           | H <sub>2</sub> O&H <sub>2</sub>       | 0.59           | H <sub>2</sub> O&OH       | 0.55           | H <sub>2</sub> O&H <sub>2</sub> O       | 0.64           | H <sub>2</sub> O&CO       | 0.69           |
| CO&H                     | 0.67           | CO&O                     | 0.74           | CO&H <sub>2</sub>                     | 0.63           | CO&OH                     | 0.72           | CO&H <sub>2</sub> O                     | 0.69           | CO&CO                     | 0.68           |
| CO <sub>2</sub> &H       | 0.73           | CO <sub>2</sub> &O       | 0.65           | CO <sub>2</sub> &H <sub>2</sub>       | 0.67           | CO <sub>2</sub> &OH       | 0.67           | CO <sub>2</sub> &H <sub>2</sub> O       | 0.69           | CO <sub>2</sub> &CO       | 0.72           |
| CHO&H                    | 0.71           | CHO&O                    | 0.72           | CHO&H <sub>2</sub>                    | 0.66           | CHO&OH                    | 0.70           | CHO&H <sub>2</sub> O                    | 0.74           | CHO&CO                    | 0.71           |
| bi-HCOO&H                | 0.71           | bi-HCOO&O                | 0.51           | bi-HCOO&H <sub>2</sub>                | 0.74           | bi-HCOO&OH                | 0.49           | bi-HCOO&H <sub>2</sub> O                | 0.60           | bi-HCOO&CO                | 0.74           |
| mono-H <sub>2</sub> CO&H | 0.68           | mono-H <sub>2</sub> CO&O | 0.59           | mono-H <sub>2</sub> CO&H <sub>2</sub> | 0.61           | mono-H <sub>2</sub> CO&OH | 0.59           | mono-H <sub>2</sub> CO&H <sub>2</sub> O | 0.59           | mono-H <sub>2</sub> CO&CO | 0.69           |
| bi-H <sub>2</sub> CO&H   | 0.72           | bi-H <sub>2</sub> CO&O   | 0.68           | bi-H <sub>2</sub> CO&H <sub>2</sub>   | 0.68           | bi-H <sub>2</sub> CO&OH   | 0.67           | bi-H <sub>2</sub> CO&H <sub>2</sub> O   | 0.74           | bi-H <sub>2</sub> CO&CO   | 0.72           |
| trans-COOH&H             | 0.70           | trans-COOH&O             | 0.72           | trans-COOH&H <sub>2</sub>             | 0.65           | trans-COOH&OH             | 0.69           | trans-COOH&H <sub>2</sub> O             | 0.73           | trans-COOH&CO             | 0.71           |
| cis-COOH&H               | 0.74           | cis-COOH&O               | 0.64           | cis-COOH&H <sub>2</sub>               | 0.70           | cis-COOH&OH               | 0.62           | cis-COOH&H <sub>2</sub> O               | 0.74           | cis-COOH&CO               | 0.74           |
| H <sub>2</sub> COO&H     | 0.53           | H <sub>2</sub> COO&O     | 0.45           | H <sub>2</sub> COO&H <sub>2</sub>     | 0.65           | H <sub>2</sub> COO&OH     | 0.39           | H <sub>2</sub> COO&H <sub>2</sub> O     | 0.46           | H <sub>2</sub> COO&CO     | 0.67           |
| HCOOH&H                  | 0.68           | HCOOH&O                  | 0.66           | HCOOH&H <sub>2</sub>                  | 0.62           | HCOOH&OH                  | 0.67           | HCOOH&H <sub>2</sub> O                  | 0.68           | HCOOH&CO                  | 0.69           |

|                      |      |                      |      |                                   |      |                       |      |                                     |      |                       |      |
|----------------------|------|----------------------|------|-----------------------------------|------|-----------------------|------|-------------------------------------|------|-----------------------|------|
| CH <sub>3</sub> O&H  | 0.67 | CH <sub>3</sub> O&O  | 0.50 | CH <sub>3</sub> O&H <sub>2</sub>  | 0.69 | CH <sub>3</sub> O&OH  | 0.43 | CH <sub>3</sub> O&H <sub>2</sub> O  | 0.59 | CH <sub>3</sub> O&CO  | 0.73 |
| CH <sub>2</sub> OH&H | 0.61 | CH <sub>2</sub> OH&O | 0.73 | CH <sub>2</sub> OH&H <sub>2</sub> | 0.57 | CH <sub>2</sub> OH&OH | 0.66 | CH <sub>2</sub> OH&H <sub>2</sub> O | 0.65 | CH <sub>2</sub> OH&CO | 0.66 |

*Continue*

| <b>IM combination</b>                  | <b>R<sup>2</sup></b> | <b>IM combination</b>      | <b>R<sup>2</sup></b> | <b>IM combination</b>          | <b>R<sup>2</sup></b> | <b>IM combination</b>                         | <b>R<sup>2</sup></b> | <b>IM combination</b>                       | <b>R<sup>2</sup></b> | <b>IM combination</b>             | <b>R<sup>2</sup></b> |
|----------------------------------------|----------------------|----------------------------|----------------------|--------------------------------|----------------------|-----------------------------------------------|----------------------|---------------------------------------------|----------------------|-----------------------------------|----------------------|
| H&CO <sub>2</sub>                      | 0.73                 | H&CHO                      | 0.71                 | H&bi-HCOO                      | 0.71                 | H&mono-H <sub>2</sub> CO                      | 0.68                 | H&bi-H <sub>2</sub> CO                      | 0.72                 | H&trans-COOH                      | 0.70                 |
| O&CO <sub>2</sub>                      | 0.65                 | O&CHO                      | 0.72                 | O&bi-HCOO                      | 0.51                 | O&mono-H <sub>2</sub> CO                      | 0.59                 | O&bi-H <sub>2</sub> CO                      | 0.68                 | O&trans-COOH                      | 0.72                 |
| H <sub>2</sub> &CO <sub>2</sub>        | 0.67                 | H <sub>2</sub> &CHO        | 0.66                 | H <sub>2</sub> &bi-HCOO        | 0.74                 | H <sub>2</sub> &mono-H <sub>2</sub> CO        | 0.61                 | H <sub>2</sub> &bi-H <sub>2</sub> CO        | 0.68                 | H <sub>2</sub> &trans-COOH        | 0.65                 |
| OH&CO <sub>2</sub>                     | 0.67                 | OH&CHO                     | 0.70                 | OH&bi-HCOO                     | 0.49                 | OH&mono-H <sub>2</sub> CO                     | 0.59                 | OH&bi-H <sub>2</sub> CO                     | 0.67                 | OH&trans-COOH                     | 0.69                 |
| H <sub>2</sub> O&CO <sub>2</sub>       | 0.69                 | H <sub>2</sub> O&CHO       | 0.74                 | H <sub>2</sub> O&bi-HCOO       | 0.60                 | H <sub>2</sub> O&mono-H <sub>2</sub> CO       | 0.59                 | H <sub>2</sub> O&bi-H <sub>2</sub> CO       | 0.74                 | H <sub>2</sub> O&trans-COOH       | 0.73                 |
| CO&CO <sub>2</sub>                     | 0.72                 | CO&CHO                     | 0.71                 | CO&bi-HCOO                     | 0.74                 | CO&mono-H <sub>2</sub> CO                     | 0.69                 | CO&bi-H <sub>2</sub> CO                     | 0.72                 | CO&trans-COOH                     | 0.71                 |
| CO <sub>2</sub> &CO <sub>2</sub>       | 0.68                 | CO <sub>2</sub> &CHO       | 0.74                 | CO <sub>2</sub> &bi-HCOO       | 0.66                 | CO <sub>2</sub> &mono-H <sub>2</sub> CO       | 0.64                 | CO <sub>2</sub> &bi-H <sub>2</sub> CO       | 0.74                 | CO <sub>2</sub> &trans-COOH       | 0.74                 |
| CHO&CO <sub>2</sub>                    | 0.74                 | CHO&CHO                    | 0.73                 | CHO&bi-HCOO                    | 0.73                 | CHO&mono-H <sub>2</sub> CO                    | 0.72                 | CHO&bi-H <sub>2</sub> CO                    | 0.74                 | CHO&trans-COOH                    | 0.73                 |
| bi-HCOO&CO <sub>2</sub>                | 0.66                 | bi-HCOO&CHO                | 0.73                 | bi-HCOO&bi-HCOO                | 0.52                 | bi-HCOO&mono-H <sub>2</sub> CO                | 0.59                 | bi-HCOO&bi-H <sub>2</sub> CO                | 0.70                 | bi-HCOO&trans-COOH                | 0.73                 |
| mono-H <sub>2</sub> CO&CO <sub>2</sub> | 0.64                 | mono-H <sub>2</sub> CO&CHO | 0.72                 | mono-H <sub>2</sub> CO&bi-HCOO | 0.59                 | mono-H <sub>2</sub> CO&mono-H <sub>2</sub> CO | 0.51                 | mono-H <sub>2</sub> CO&bi-H <sub>2</sub> CO | 0.74                 | mono-H <sub>2</sub> CO&trans-COOH | 0.73                 |
| bi-H <sub>2</sub> CO&CO <sub>2</sub>   | 0.74                 | bi-H <sub>2</sub> CO&CHO   | 0.74                 | bi-H <sub>2</sub> CO&bi-HCOO   | 0.70                 | bi-H <sub>2</sub> CO&mono-H <sub>2</sub> CO   | 0.74                 | bi-H <sub>2</sub> CO&bi-H <sub>2</sub> CO   | 0.74                 | bi-H <sub>2</sub> CO&trans-COOH   | 0.74                 |
| trans-COOH&CO <sub>2</sub>             | 0.74                 | trans-COOH&CHO             | 0.73                 | trans-COOH&bi-HCOO             | 0.73                 | trans-COOH&mono-H <sub>2</sub> CO             | 0.73                 | trans-COOH&bi-H <sub>2</sub> CO             | 0.74                 | trans-COOH&trans-COOH             | 0.72                 |
| cis-COOH&CO <sub>2</sub>               | 0.73                 | cis-COOH&CHO               | 0.75                 | cis-COOH&bi-HCOO               | 0.66                 | cis-COOH&mono-H <sub>2</sub> CO               | 0.73                 | cis-COOH&bi-H <sub>2</sub> CO               | 0.74                 | cis-COOH&trans-COOH               | 0.74                 |
| H <sub>2</sub> COO&CO <sub>2</sub>     | 0.59                 | H <sub>2</sub> COO&CHO     | 0.62                 | H <sub>2</sub> COO&bi-HCOO     | 0.45                 | H <sub>2</sub> COO&mono-H <sub>2</sub> CO     | 0.51                 | H <sub>2</sub> COO&bi-H <sub>2</sub> CO     | 0.59                 | H <sub>2</sub> COO&trans-COOH     | 0.62                 |
| HCOOH&CO <sub>2</sub>                  | 0.70                 | HCOOH&CHO                  | 0.73                 | HCOOH&bi-HCOO                  | 0.67                 | HCOOH&mono-H <sub>2</sub> CO                  | 0.64                 | HCOOH&bi-H <sub>2</sub> CO                  | 0.73                 | HCOOH&trans-COOH                  | 0.73                 |

|                                    |      |                        |      |                            |      |                                           |      |                                         |      |                               |      |
|------------------------------------|------|------------------------|------|----------------------------|------|-------------------------------------------|------|-----------------------------------------|------|-------------------------------|------|
| CH <sub>3</sub> O&CO <sub>2</sub>  | 0.68 | CH <sub>3</sub> O&CHO  | 0.71 | CH <sub>3</sub> O&bi-HCOO  | 0.50 | CH <sub>3</sub> O&mono-H <sub>2</sub> CO  | 0.62 | CH <sub>3</sub> O&bi-H <sub>2</sub> CO  | 0.69 | CH <sub>3</sub> O&trans-COOH  | 0.71 |
| CH <sub>2</sub> OH&CO <sub>2</sub> | 0.71 | CH <sub>2</sub> OH&CHO | 0.69 | CH <sub>2</sub> OH&bi-HCOO | 0.74 | CH <sub>2</sub> OH&mono-H <sub>2</sub> CO | 0.67 | CH <sub>2</sub> OH&bi-H <sub>2</sub> CO | 0.71 | CH <sub>2</sub> OH&trans-COOH | 0.68 |

*Continue*

| <b>IM combination</b>           | <b>R<sup>2</sup></b> | <b>IM combination</b>                     | <b>R<sup>2</sup></b> | <b>IM combination</b>        | <b>R<sup>2</sup></b> | <b>IM combination</b>                    | <b>R<sup>2</sup></b> | <b>IM combination</b>                     | <b>R<sup>2</sup></b> | <b>IM combination</b>                     | <b>R<sup>2</sup></b> |
|---------------------------------|----------------------|-------------------------------------------|----------------------|------------------------------|----------------------|------------------------------------------|----------------------|-------------------------------------------|----------------------|-------------------------------------------|----------------------|
| H&cis-COOH                      | 0.74                 | H&H <sub>2</sub> COO                      | 0.54                 | H&HCOOH                      | 0.67                 | H&CH <sub>3</sub> O                      | 0.67                 | H&CH <sub>2</sub> OH                      | 0.61                 | H&CH <sub>3</sub> OH                      | 0.66                 |
| O&cis-COOH                      | 0.64                 | O&H <sub>2</sub> COO                      | 0.44                 | O&HCOOH                      | 0.65                 | O&CH <sub>3</sub> O                      | 0.50                 | O&CH <sub>2</sub> OH                      | 0.73                 | O&CH <sub>3</sub> OH                      | 0.59                 |
| H <sub>2</sub> &cis-COOH        | 0.70                 | H <sub>2</sub> &H <sub>2</sub> COO        | 0.65                 | H <sub>2</sub> &HCOOH        | 0.62                 | H <sub>2</sub> &CH <sub>3</sub> O        | 0.69                 | H <sub>2</sub> &CH <sub>2</sub> OH        | 0.57                 | H <sub>2</sub> &CH <sub>3</sub> OH        | 0.59                 |
| OH&cis-COOH                     | 0.62                 | OH&H <sub>2</sub> COO                     | 0.39                 | OH&HCOOH                     | 0.67                 | OH&CH <sub>3</sub> O                     | 0.43                 | OH&CH <sub>2</sub> OH                     | 0.66                 | OH&CH <sub>3</sub> OH                     | 0.57                 |
| H <sub>2</sub> O&cis-COOH       | 0.74                 | H <sub>2</sub> O&H <sub>2</sub> COO       | 0.46                 | H <sub>2</sub> O&HCOOH       | 0.68                 | H <sub>2</sub> O&CH <sub>3</sub> O       | 0.59                 | H <sub>2</sub> O&CH <sub>2</sub> OH       | 0.65                 | H <sub>2</sub> O&CH <sub>3</sub> OH       | 0.67                 |
| CO&cis-COOH                     | 0.74                 | CO&H <sub>2</sub> COO                     | 0.67                 | CO&HCOOH                     | 0.69                 | CO&CH <sub>3</sub> O                     | 0.73                 | CO&CH <sub>2</sub> OH                     | 0.66                 | CO&CH <sub>3</sub> OH                     | 0.69                 |
| CO <sub>2</sub> &cis-COOH       | 0.73                 | CO <sub>2</sub> &H <sub>2</sub> COO       | 0.59                 | CO <sub>2</sub> &HCOOH       | 0.70                 | CO <sub>2</sub> &CH <sub>3</sub> O       | 0.68                 | CO <sub>2</sub> &CH <sub>2</sub> OH       | 0.71                 | CO <sub>2</sub> &CH <sub>3</sub> OH       | 0.70                 |
| CHO&cis-COOH                    | 0.75                 | CHO&H <sub>2</sub> COO                    | 0.62                 | CHO&HCOOH                    | 0.73                 | CHO&CH <sub>3</sub> O                    | 0.71                 | CHO&CH <sub>2</sub> OH                    | 0.69                 | CHO&CH <sub>3</sub> OH                    | 0.74                 |
| bi-HCOO&cis-COOH                | 0.66                 | bi-HCOO&H <sub>2</sub> COO                | 0.45                 | bi-HCOO&HCOOH                | 0.67                 | bi-HCOO&CH <sub>3</sub> O                | 0.50                 | bi-HCOO&CH <sub>2</sub> OH                | 0.74                 | bi-HCOO&CH <sub>3</sub> OH                | 0.62                 |
| mono-H <sub>2</sub> CO&cis-COOH | 0.73                 | mono-H <sub>2</sub> CO&H <sub>2</sub> COO | 0.51                 | mono-H <sub>2</sub> CO&HCOOH | 0.64                 | mono-H <sub>2</sub> CO&CH <sub>3</sub> O | 0.62                 | mono-H <sub>2</sub> CO&CH <sub>2</sub> OH | 0.67                 | mono-H <sub>2</sub> CO&CH <sub>3</sub> OH | 0.62                 |
| bi-H <sub>2</sub> CO&cis-COOH   | 0.74                 | bi-H <sub>2</sub> CO&H <sub>2</sub> COO   | 0.59                 | bi-H <sub>2</sub> CO&HCOOH   | 0.73                 | bi-H <sub>2</sub> CO&CH <sub>3</sub> O   | 0.69                 | bi-H <sub>2</sub> CO&CH <sub>2</sub> OH   | 0.71                 | bi-H <sub>2</sub> CO&CH <sub>3</sub> OH   | 0.74                 |
| trans-COOH&cis-COOH             | 0.74                 | trans-COOH&H <sub>2</sub> COO             | 0.62                 | trans-COOH&HCOOH             | 0.73                 | trans-COOH&CH <sub>3</sub> O             | 0.70                 | trans-COOH&CH <sub>2</sub> OH             | 0.68                 | trans-COOH&CH <sub>3</sub> OH             | 0.73                 |
| cis-COOH&cis-COOH               | 0.72                 | cis-COOH&H <sub>2</sub> COO               | 0.55                 | cis-COOH&HCOOH               | 0.75                 | cis-COOH&CH <sub>3</sub> O               | 0.64                 | cis-COOH&CH <sub>2</sub> OH               | 0.72                 | cis-COOH&CH <sub>3</sub> OH               | 0.74                 |
| H <sub>2</sub> COO&cis-COOH     | 0.55                 | H <sub>2</sub> COO&H <sub>2</sub> COO     | 0.38                 | H <sub>2</sub> COO&HCOOH     | 0.56                 | H <sub>2</sub> COO&CH <sub>3</sub> O     | 0.41                 | H <sub>2</sub> COO&CH <sub>2</sub> OH     | 0.59                 | H <sub>2</sub> COO&CH <sub>3</sub> OH     | 0.47                 |
| HCOOH&cis-COOH                  | 0.75                 | HCOOH&H <sub>2</sub> COO                  | 0.56                 | HCOOH&HCOOH                  | 0.68                 | HCOOH&CH <sub>3</sub> O                  | 0.69                 | HCOOH&CH <sub>2</sub> OH                  | 0.67                 | HCOOH&CH <sub>3</sub> OH                  | 0.69                 |
| CH <sub>3</sub> O&cis-COOH      | 0.64                 | CH <sub>3</sub> O&H <sub>2</sub> COO      | 0.41                 | CH <sub>3</sub> O&HCOOH      | 0.69                 | CH <sub>3</sub> O&CH <sub>3</sub> O      | 0.46                 | CH <sub>3</sub> O&CH <sub>2</sub> OH      | 0.69                 | CH <sub>3</sub> O&CH <sub>3</sub> OH      | 0.61                 |



|                                         |      |                                              |      |                                      |      |                                             |      |                                              |      |                                              |      |
|-----------------------------------------|------|----------------------------------------------|------|--------------------------------------|------|---------------------------------------------|------|----------------------------------------------|------|----------------------------------------------|------|
| $\text{CH}_2\text{OH}\&\text{cis-COOH}$ | 0.72 | $\text{CH}_2\text{OH}\&\text{H}_2\text{COO}$ | 0.59 | $\text{CH}_2\text{OH}\&\text{HCOOH}$ | 0.67 | $\text{CH}_2\text{OH}\&\text{CH}_3\text{O}$ | 0.69 | $\text{CH}_2\text{OH}\&\text{CH}_2\text{OH}$ | 0.61 | $\text{CH}_2\text{OH}\&\text{CH}_3\text{OH}$ | 0.65 |
|-----------------------------------------|------|----------------------------------------------|------|--------------------------------------|------|---------------------------------------------|------|----------------------------------------------|------|----------------------------------------------|------|

---

Table S3. Summary of dual intermediate descriptors with an average determination coefficient of 0.75.

| Main component         | Paired components                                                                                         |
|------------------------|-----------------------------------------------------------------------------------------------------------|
| bi-H <sub>2</sub> CO   | H <sub>2</sub> O, CO <sub>2</sub> , CHO, mono-H <sub>2</sub> CO, trans-COOH, cis-COOH, CH <sub>3</sub> OH |
| cis-COOH               | H, H <sub>2</sub> O, CO, bi-H <sub>2</sub> CO, trans-COOH, CH <sub>3</sub> OH                             |
| CHO                    | H <sub>2</sub> O, CO <sub>2</sub> , bi-H <sub>2</sub> CO, CH <sub>3</sub> OH                              |
| CO                     | O, bi-HCOO, cis-COOH                                                                                      |
| trans-COOH             | CO <sub>2</sub> , bi-H <sub>2</sub> CO, cis-COOH                                                          |
| bi-HCOO                | H <sub>2</sub> , CO, CH <sub>2</sub> OH                                                                   |
| H <sub>2</sub> O       | CHO, bi-H <sub>2</sub> CO, cis-COOH                                                                       |
| CO <sub>2</sub>        | CHO, bi-H <sub>2</sub> CO, trans-COOH                                                                     |
| CH <sub>3</sub> OH     | CHO, bi-H <sub>2</sub> CO, cis-COOH                                                                       |
| H <sub>2</sub>         | O, bi-HCOO                                                                                                |
| O                      | CO                                                                                                        |
| H                      | cis-COOH                                                                                                  |
| CH <sub>2</sub> OH     | bi-HCOO                                                                                                   |
| mono-H <sub>2</sub> CO | bi-H <sub>2</sub> CO                                                                                      |

Table S4. Data statistics used in MLR for predicting thermodynamic properties research.

| <i>Substrate</i> | <i>Species</i>       | <b>DFT<br/>results</b> | $EN_{IM}$ | $Chg_{IM}$ | $WF_{IM}$ | $WF_{Sub}$ | $SD_{Sub}$ | $Chg_{IM-Sub}$ | $BL_{IM-Sub}$ |
|------------------|----------------------|------------------------|-----------|------------|-----------|------------|------------|----------------|---------------|
| <b>Cu</b>        | $CO^*$               | -247.03                | 5.99      | 10.26      | 8.961     | 4.398      | 0.13       | 0.26           | 1.97          |
|                  | $CO_2^*$             | -254.22                | 9.43      | 16.07      | 8.875     | 4.399      | 0.06       | 0.07           | 3.46          |
|                  | $HCO^*$              | -250.14                | 8.19      | 11.42      | 5.633     | 4.396      | 0.20       | 0.42           | 1.99          |
|                  | $bi-HCOO^*$          | -258.78                | 11.63     | 17.65      | 4.897     | 4.393      | 0.14       | 0.65           | 1.97          |
|                  | $bi-H_2CO^*$         | -254.19                | 10.39     | 12.75      | 6.187     | 4.395      | 0.27       | 0.75           | 2.10          |
|                  | $trans-COOH^*$       | -257.84                | 11.63     | 17.43      | 6.184     | 4.394      | 0.16       | 0.43           | 1.99          |
|                  | $cis-COOH^*$         | -257.93                | 11.63     | 17.49      | 6.794     | 4.395      | 0.21       | 0.49           | 1.99          |
|                  | $H_2COO^*$           | -262.16                | 13.83     | 19.10      | 7.441     | 4.393      | 0.24       | 1.10           | 1.96          |
|                  | $HCOOH^*$            | -261.40                | 13.83     | 18.01      | 6.664     | 4.397      | 0.11       | 0.01           | 2.13          |
|                  | $CH_3O^*$            | -258.47                | 12.59     | 13.57      | 6.031     | 4.395      | 0.16       | 0.57           | 1.96          |
|                  | $CH_2OH^*$           | -257.72                | 12.59     | 13.26      | 4.960     | 4.395      | 0.14       | 0.26           | 2.04          |
|                  | $CH_3OH^*$           | -262.00                | 14.79     | 14.01      | 6.165     | 4.398      | 0.10       | 0.01           | 2.11          |
|                  | $(CO + H)^*$         | -250.74                | 8.19      | 11.49      | 7.403     | 4.395      | 0.22       | 0.49           | 1.80          |
|                  | $(CO + H_2O)^*$      | -261.92                | 13.83     | 18.34      | 6.936     | 4.395      | 0.16       | 0.34           | 2.03          |
|                  | $(CO_2 + H_C)^*$     | -257.97                | 11.63     | 17.33      | 7.608     | 4.396      | 0.14       | 0.33           | 2.65          |
|                  | $(CO_2 + H_O)^*$     | -257.96                | 11.63     | 17.33      | 7.480     | 4.396      | 0.14       | 0.33           | 2.47          |
|                  | $(HCO + H)^*$        | -253.87                | 10.39     | 12.69      | 5.534     | 4.393      | 0.23       | 0.69           | 1.81          |
|                  | $(HCO + OH)^*$       | -261.25                | 13.83     | 19.08      | 6.478     | 4.394      | 0.38       | 1.08           | 2.03          |
|                  | $(HCO + OH + H)^*$   | -265.09                | 16.03     | 19.62      | 6.738     | 4.393      | 0.19       | 0.62           | 1.36          |
|                  | $(bi-HCOO + H_C)^*$  | -261.96                | 13.83     | 18.85      | 7.640     | 4.391      | 0.17       | 0.85           | 1.74          |
|                  | $(bi-HCOO + H_O)^*$  | -262.46                | 13.83     | 18.90      | 7.697     | 4.392      | 0.19       | 0.90           | 1.81          |
|                  | $(bi-H_2CO + H_C)^*$ | -257.85                | 12.59     | 13.99      | 6.197     | 4.394      | 0.31       | 0.99           | 1.88          |
|                  | $(bi-H_2CO + H_O)^*$ | -257.37                | 12.59     | 13.96      | 6.182     | 4.394      | 0.29       | 0.96           | 1.81          |
|                  | $(bi-H_2CO+OH)^*$    | -265.33                | 16.03     | 20.25      | 6.913     | 4.392      | 0.33       | 1.25           | 2.06          |

|              |                     |         |       |       |       |       |      |       |      |
|--------------|---------------------|---------|-------|-------|-------|-------|------|-------|------|
|              | $(bi-H_2CO+OH+H)^*$ | -268.83 | 18.23 | 21.49 | 7.179 | 4.391 | 0.37 | 1.49  | 1.92 |
|              | $(bi-H_2CO+H_2O)^*$ | -268.98 | 18.23 | 20.74 | 6.133 | 4.394 | 0.29 | 0.74  | 2.13 |
|              | $(trans-COOH+H)^*$  | -261.55 | 13.83 | 18.69 | 6.194 | 4.392 | 0.21 | 0.69  | 1.82 |
|              | $(cis-COOH + H)^*$  | -261.65 | 13.83 | 18.75 | 6.790 | 4.393 | 0.25 | 0.75  | 1.82 |
|              | $(H_2COO+H)^*$      | -265.76 | 16.03 | 20.34 | 8.329 | 4.392 | 0.30 | 1.34  | 1.80 |
|              | $(HCOOH+H)^*$       | -265.17 | 16.03 | 19.30 | 6.631 | 4.395 | 0.17 | 0.30  | 1.88 |
|              | $(CH_3O+H)^*$       | -262.02 | 14.79 | 14.81 | 6.644 | 4.393 | 0.25 | 0.81  | 1.80 |
|              | $(CH_2OH+H)^*$      | -261.38 | 14.79 | 14.52 | 4.972 | 4.394 | 0.20 | 0.52  | 1.85 |
|              | $CO^*$              | -246.55 | 5.99  | 10.16 | 8.948 | 4.826 | 0.12 | 0.16  | 2.12 |
|              | $CO_2^*$            | -254.01 | 9.43  | 16.06 | 8.901 | 4.825 | 0.04 | 0.06  | 3.66 |
|              | $HCO^*$             | -249.60 | 8.19  | 11.15 | 5.285 | 4.824 | 0.07 | 0.15  | 1.95 |
|              | $bi-HCOO^*$         | -258.15 | 11.63 | 17.62 | 7.528 | 4.815 | 0.21 | 0.62  | 1.96 |
|              | $bi-H_2CO^*$        | -253.48 | 10.39 | 12.12 | 6.161 | 4.821 | 0.12 | 0.12  | 2.48 |
|              | $trans-COOH^*$      | -257.23 | 11.63 | 17.24 | 6.008 | 4.824 | 0.15 | 0.24  | 2.09 |
|              | $cis-COOH^*$        | -257.19 | 11.63 | 17.33 | 6.364 | 4.821 | 0.09 | 0.33  | 1.94 |
|              | $H_2COO^*$          | -260.61 | 13.83 | 18.95 | 7.424 | 4.824 | 0.24 | 0.95  | 2.10 |
|              | $HCOOH^*$           | -261.14 | 13.83 | 17.99 | 6.655 | 4.821 | 0.12 | -0.01 | 2.14 |
| <b>Au-Cu</b> | $CH_3O^*$           | -257.66 | 12.59 | 13.54 | 6.168 | 4.820 | 0.39 | 0.54  | 2.01 |
|              | $CH_2OH^*$          | -257.26 | 12.59 | 13.18 | 4.918 | 4.816 | 0.20 | 0.18  | 2.01 |
|              | $CH_3OH^*$          | -261.73 | 14.79 | 13.99 | 6.132 | 4.822 | 0.11 | -0.01 | 2.13 |
|              | $(CO + H)^*$        | -250.07 | 8.19  | 11.26 | 7.513 | 4.823 | 0.14 | 0.26  | 1.78 |
|              | $(CO + H_2O)^*$     | -261.30 | 13.83 | 18.18 | 7.148 | 4.822 | 0.16 | 0.18  | 2.11 |
|              | $(CO_2 + H_C)^*$    | -257.53 | 11.63 | 17.20 | 7.563 | 4.826 | 0.11 | 0.20  | 2.70 |
|              | $(CO_2 + H_O)^*$    | -257.51 | 11.63 | 17.19 | 7.515 | 4.826 | 0.10 | 0.19  | 2.72 |
|              | $(HCO + H)^*$       | -253.10 | 10.39 | 12.30 | 5.126 | 4.825 | 0.13 | 0.30  | 1.83 |
|              | $(HCO + OH)^*$      | -260.22 | 13.83 | 18.67 | 6.184 | 4.822 | 0.16 | 0.67  | 2.03 |
|              | $(HCO + OH + H)^*$  | -263.89 | 16.03 | 19.55 | 6.751 | 4.823 | 0.14 | 0.55  | 2.44 |

---

|                      |         |       |       |        |       |      |      |      |
|----------------------|---------|-------|-------|--------|-------|------|------|------|
| $(bi-HCOO + H_C)^*$  | -261.63 | 13.83 | 18.76 | 7.479  | 4.816 | 0.23 | 0.76 | 1.84 |
| $(bi-HCOO + H_O)^*$  | -261.63 | 13.83 | 18.76 | 7.613  | 4.816 | 0.23 | 0.76 | 1.84 |
| $(bi-H_2CO + H_C)^*$ | -257.09 | 12.59 | 13.26 | 6.087  | 4.821 | 0.16 | 0.26 | 1.90 |
| $(bi-H_2CO + H_O)^*$ | -256.97 | 12.59 | 13.22 | 6.165  | 4.821 | 0.14 | 0.22 | 1.91 |
| $(bi-H_2CO+OH)^*$    | -264.66 | 16.03 | 19.54 | 19.304 | 4.817 | 0.17 | 0.54 | 1.98 |
| $(bi-H_2CO+OH+H)^*$  | -268.15 | 18.23 | 20.69 | 7.119  | 4.817 | 0.20 | 0.69 | 1.85 |
| $(bi-H_2CO+H_2O)^*$  | -268.12 | 18.23 | 20.02 | 5.778  | 4.820 | 0.13 | 0.02 | 2.53 |
| $(trans-COOH+H)^*$   | -260.75 | 13.83 | 18.39 | 6.036  | 4.824 | 0.17 | 0.39 | 1.90 |
| $(cis-COOH + H)^*$   | -260.96 | 13.83 | 18.56 | 6.727  | 4.818 | 0.25 | 0.56 | 1.86 |
| $(H_2COO+H)^*$       | -264.10 | 16.03 | 20.08 | 7.474  | 4.826 | 0.27 | 1.08 | 1.91 |
| $(HCOOH+H)^*$        | -264.66 | 16.03 | 19.17 | 6.622  | 4.821 | 0.16 | 0.17 | 1.92 |
| $(CH_3O+H)^*$        | -261.14 | 14.79 | 14.68 | 6.161  | 4.820 | 0.41 | 0.68 | 1.86 |
| $(CH_2OH+H)^*$       | -260.76 | 14.79 | 14.33 | 4.838  | 4.817 | 0.22 | 0.33 | 1.86 |

---

**Ni-Cu**

|                 |         |       |       |       |       |      |      |      |
|-----------------|---------|-------|-------|-------|-------|------|------|------|
| $CO^*$          | -270.30 | 5.99  | 10.25 | 8.937 | 4.444 | 0.11 | 0.25 | 1.72 |
| $CO_2^*$        | -277.38 | 9.43  | 16.61 | 8.412 | 4.441 | 0.19 | 0.61 | 1.98 |
| $HCO^*$         | -273.28 | 8.19  | 11.62 | 5.719 | 4.443 | 0.31 | 0.62 | 1.89 |
| $bi-HCOO^*$     | -281.58 | 11.63 | 17.65 | 7.793 | 4.443 | 0.18 | 0.65 | 1.89 |
| $bi-H_2CO^*$    | -277.17 | 10.39 | 12.47 | 6.217 | 4.441 | 0.21 | 0.47 | 1.84 |
| $trans-COOH^*$  | -280.97 | 11.63 | 17.45 | 6.389 | 4.443 | 0.21 | 0.45 | 1.88 |
| $cis-COOH^*$    | -280.95 | 11.63 | 17.50 | 6.895 | 4.441 | 0.20 | 0.50 | 1.89 |
| $H_2COO^*$      | -284.78 | 13.83 | 19.06 | 7.438 | 4.440 | 0.24 | 1.06 | 1.93 |
| $HCOOH^*$       | -284.13 | 13.83 | 18.36 | 6.785 | 4.443 | 0.14 | 0.36 | 2.05 |
| $CH_3O^*$       | -281.00 | 12.59 | 13.54 | 6.057 | 4.443 | 0.14 | 0.54 | 1.94 |
| $CH_2OH^*$      | -280.48 | 12.59 | 13.24 | 5.089 | 4.444 | 0.20 | 0.24 | 1.99 |
| $CH_3OH^*$      | -284.46 | 14.79 | 14.01 | 6.130 | 4.445 | 0.10 | 0.01 | 2.03 |
| $(CO + H)^*$    | -274.19 | 8.19  | 11.49 | 7.487 | 4.445 | 0.14 | 0.49 | 1.68 |
| $(CO + H_2O)^*$ | -285.39 | 13.83 | 18.27 | 7.041 | 4.442 | 0.15 | 0.27 | 1.89 |

---

|              |                      |         |       |       |       |       |      |      |      |
|--------------|----------------------|---------|-------|-------|-------|-------|------|------|------|
|              | $(CO_2 + H_C)^*$     | -281.26 | 11.63 | 17.85 | 7.595 | 4.440 | 0.22 | 0.85 | 1.80 |
|              | $(CO_2 + H_O)^*$     | -281.26 | 11.63 | 17.85 | 7.503 | 4.438 | 0.22 | 0.85 | 1.80 |
|              | $(HCO + H)^*$        | -278.00 | 10.39 | 12.66 | 5.734 | 4.443 | 0.20 | 0.66 | 1.74 |
|              | $(HCO + OH)^*$       | -285.74 | 13.83 | 19.03 | 7.210 | 4.439 | 0.26 | 1.03 | 1.83 |
|              | $(HCO + OH + H)^*$   | -289.43 | 16.03 | 20.24 | 7.144 | 4.438 | 0.30 | 1.24 | 1.79 |
|              | $(bi-HCOO + H_C)^*$  | -285.50 | 13.83 | 18.90 | 7.610 | 4.442 | 0.21 | 0.90 | 1.75 |
|              | $(bi-HCOO + H_O)^*$  | -285.50 | 13.83 | 18.90 | 7.629 | 4.441 | 0.21 | 0.90 | 1.75 |
|              | $(bi-H_2CO + H_C)^*$ | -281.11 | 12.59 | 13.71 | 6.112 | 4.440 | 0.24 | 0.71 | 1.73 |
|              | $(bi-H_2CO + H_O)^*$ | -281.07 | 12.59 | 13.71 | 6.175 | 4.440 | 0.24 | 0.71 | 1.73 |
|              | $(bi-H_2CO+OH)^*$    | -288.34 | 16.03 | 20.09 | 7.034 | 4.443 | 0.43 | 1.09 | 1.98 |
|              | $(bi-H_2CO+OH+H)^*$  | -292.02 | 18.23 | 21.15 | 6.585 | 4.442 | 0.40 | 1.15 | 1.83 |
|              | $(bi-H_2CO+H_2O)^*$  | -291.97 | 18.23 | 20.48 | 5.816 | 4.444 | 0.23 | 0.48 | 2.03 |
|              | $(trans-COOH+H)^*$   | -284.90 | 13.83 | 18.68 | 6.409 | 4.439 | 0.24 | 0.68 | 1.75 |
|              | $(cis-COOH + H)^*$   | -284.87 | 13.83 | 18.74 | 6.055 | 4.436 | 0.23 | 0.74 | 1.75 |
|              | $(H_2COO+H)^*$       | -288.75 | 16.03 | 20.30 | 7.415 | 4.436 | 0.27 | 1.30 | 1.78 |
|              | $(HCOOH+H)^*$        | -288.06 | 16.03 | 19.60 | 7.255 | 4.442 | 0.17 | 0.60 | 1.84 |
|              | $(CH_3O+H)^*$        | -284.98 | 14.79 | 14.79 | 5.929 | 4.442 | 0.18 | 0.79 | 1.78 |
|              | $(CH_2OH+H)^*$       | -284.42 | 14.79 | 14.48 | 5.037 | 4.443 | 0.23 | 0.48 | 1.81 |
|              | $CO^*$               | -278.97 | 5.99  | 10.20 | 8.960 | 4.414 | 0.38 | 0.20 | 2.05 |
|              | $CO_2^*$             | -285.82 | 9.43  | 16.48 | 8.409 | 4.401 | 0.12 | 0.48 | 2.06 |
|              | $HCO^*$              | -281.81 | 8.19  | 11.21 | 5.343 | 4.404 | 0.10 | 0.21 | 2.10 |
|              | $bi-HCOO^*$          | -290.14 | 11.63 | 17.65 | 7.637 | 4.399 | 0.20 | 0.65 | 1.96 |
| <b>Pd-Cu</b> | $bi-H_2CO^*$         | -285.74 | 10.39 | 12.32 | 6.131 | 4.401 | 0.07 | 0.32 | 2.02 |
|              | $trans-COOH^*$       | -289.41 | 11.63 | 17.29 | 6.096 | 4.405 | 0.12 | 0.29 | 2.04 |
|              | $cis-COOH^*$         | -289.25 | 11.63 | 17.33 | 6.572 | 4.405 | 0.12 | 0.33 | 2.20 |
|              | $H_2COO^*$           | -292.92 | 13.83 | 18.99 | 7.425 | 4.405 | 0.22 | 0.99 | 2.05 |
|              | $HCOOH^*$            | -293.01 | 13.83 | 18.21 | 6.587 | 4.401 | 0.07 | 0.21 | 2.09 |



|              |                      |         |       |       |       |       |      |      |      |
|--------------|----------------------|---------|-------|-------|-------|-------|------|------|------|
|              | $CH_3O^*$            | -289.63 | 12.59 | 13.51 | 5.916 | 4.400 | 0.12 | 0.51 | 2.06 |
|              | $CH_2OH^*$           | -289.29 | 12.59 | 13.07 | 4.663 | 4.406 | 0.11 | 0.07 | 2.09 |
|              | $CH_3OH^*$           | -293.46 | 14.79 | 14.02 | 6.166 | 4.401 | 0.08 | 0.02 | 2.13 |
|              | $(CO + H)^*$         | -282.71 | 8.19  | 11.37 | 7.480 | 4.419 | 0.39 | 0.37 | 1.86 |
|              | $(CO + H_2O)^*$      | -293.73 | 13.83 | 18.18 | 7.026 | 4.414 | 0.39 | 0.18 | 2.22 |
|              | $(CO_2 + H_C)^*$     | -289.62 | 11.63 | 17.51 | 8.072 | 4.405 | 0.16 | 0.51 | 1.91 |
|              | $(CO_2 + H_O)^*$     | -289.62 | 11.63 | 17.51 | 8.118 | 4.405 | 0.16 | 0.51 | 1.92 |
|              | $(HCO + H)^*$        | -285.58 | 10.39 | 12.37 | 5.396 | 4.407 | 0.14 | 0.37 | 1.90 |
|              | $(HCO + OH)^*$       | -292.86 | 13.83 | 18.91 | 5.891 | 4.408 | 0.38 | 0.91 | 2.07 |
|              | $(HCO + OH + H)^*$   | -296.41 | 16.03 | 19.77 | 6.765 | 4.402 | 0.23 | 0.77 | 2.14 |
|              | $(bi-HCOO + H_C)^*$  | -293.90 | 13.83 | 18.82 | 7.576 | 4.403 | 0.22 | 0.82 | 1.82 |
|              | $(bi-HCOO + H_O)^*$  | -293.90 | 13.83 | 18.82 | 7.518 | 4.403 | 0.22 | 0.82 | 1.82 |
|              | $(bi-H_2CO + H_C)^*$ | -289.55 | 12.59 | 13.49 | 6.115 | 4.403 | 0.18 | 0.49 | 1.85 |
|              | $(bi-H_2CO + H_O)^*$ | -289.54 | 12.59 | 13.49 | 6.128 | 4.405 | 0.12 | 0.49 | 1.85 |
|              | $(bi-H_2CO+OH)^*$    | -296.65 | 16.03 | 19.80 | 6.679 | 4.399 | 0.22 | 0.80 | 2.12 |
|              | $(bi-H_2CO+OH+H)^*$  | -300.17 | 18.23 | 20.93 | 6.672 | 4.405 | 0.24 | 0.93 | 1.96 |
|              | $(bi-H_2CO+H_2O)^*$  | -300.60 | 18.23 | 20.32 | 5.955 | 4.401 | 0.10 | 0.32 | 2.09 |
|              | $(trans-COOH+H)^*$   | -293.16 | 13.83 | 18.40 | 6.064 | 4.409 | 0.14 | 0.40 | 1.92 |
|              | $(cis-COOH + H)^*$   | -293.01 | 13.83 | 18.43 | 6.597 | 4.411 | 0.16 | 0.43 | 2.00 |
|              | $(H_2COO+H)^*$       | -296.72 | 16.03 | 20.15 | 7.392 | 4.408 | 0.24 | 1.15 | 1.86 |
|              | $(HCOOH+H)^*$        | -296.75 | 16.03 | 19.41 | 6.584 | 4.403 | 0.15 | 0.41 | 1.91 |
|              | $(CH_3O+H)^*$        | -293.46 | 14.79 | 14.68 | 5.984 | 4.404 | 0.15 | 0.68 | 1.87 |
|              | $(CH_2OH+H)^*$       | -293.19 | 14.79 | 14.27 | 4.516 | 4.409 | 0.14 | 0.27 | 1.90 |
|              | $CO^*$               | -294.36 | 5.99  | 10.19 | 9.011 | 4.894 | 0.38 | 0.19 | 2.04 |
|              | $CO_2^*$             | -301.01 | 9.43  | 16.44 | 8.539 | 4.875 | 0.08 | 0.44 | 2.02 |
| <b>Pt-Cu</b> | $HCO^*$              | -297.14 | 8.19  | 11.06 | 5.055 | 4.898 | 0.10 | 0.06 | 1.96 |
|              | $bi-HCOO^*$          | -304.90 | 11.63 | 17.61 | 7.627 | 4.856 | 0.21 | 0.61 | 1.94 |

---

|                                                |         |       |       |       |       |      |       |      |
|------------------------------------------------|---------|-------|-------|-------|-------|------|-------|------|
| <i>bi-H<sub>2</sub>CO</i> *                    | -300.90 | 10.39 | 12.33 | 6.129 | 4.872 | 0.08 | 0.33  | 2.00 |
| <i>trans-COOH</i> *                            | -304.90 | 11.63 | 17.22 | 6.043 | 4.867 | 0.13 | 0.22  | 2.00 |
| <i>cis-COOH</i> *                              | -304.53 | 11.63 | 17.22 | 6.362 | 4.882 | 0.09 | 0.22  | 1.98 |
| <i>H<sub>2</sub>COO</i> *                      | -307.87 | 13.83 | 18.91 | 7.398 | 4.880 | 0.25 | 0.91  | 2.04 |
| <i>HCOOH</i> *                                 | -308.07 | 13.83 | 18.25 | 6.566 | 4.873 | 0.08 | 0.25  | 2.05 |
| <i>CH<sub>3</sub>O</i> *                       | -304.60 | 12.59 | 13.44 | 6.005 | 4.881 | 0.12 | 0.44  | 2.03 |
| <i>CH<sub>2</sub>OH</i> *                      | -304.81 | 12.59 | 13.02 | 4.764 | 4.867 | 0.09 | 0.02  | 2.08 |
| <i>CH<sub>3</sub>OH</i> *                      | -308.49 | 14.79 | 13.98 | 6.130 | 4.875 | 0.07 | -0.03 | 2.08 |
| <i>(CO + H)</i> *                              | -298.36 | 8.19  | 11.30 | 7.478 | 4.891 | 0.38 | 0.30  | 1.87 |
| <i>(CO + H<sub>2</sub>O)</i> *                 | -309.14 | 13.83 | 18.15 | 7.127 | 4.883 | 0.38 | 0.15  | 2.21 |
| <i>(CO<sub>2</sub> + H<sub>-</sub>C)</i> *     | -304.79 | 11.63 | 17.45 | 7.527 | 4.881 | 0.13 | 0.45  | 1.80 |
| <i>(CO<sub>2</sub> + H<sub>-</sub>O)</i> *     | -305.04 | 11.63 | 17.55 | 7.468 | 4.880 | 0.11 | 0.55  | 1.86 |
| <i>(HCO + H)</i> *                             | -301.17 | 10.39 | 12.18 | 5.025 | 4.888 | 0.13 | 0.18  | 1.83 |
| <i>(HCO + OH)</i> *                            | -307.92 | 13.83 | 18.62 | 4.459 | 4.884 | 0.25 | 0.62  | 2.07 |
| <i>(HCO + OH + H)</i> *                        | -311.84 | 16.03 | 19.13 | 7.022 | 4.877 | 0.10 | 0.13  | 1.93 |
| <i>(bi-HCOO + H<sub>-</sub>C)</i> *            | -308.90 | 13.83 | 18.72 | 7.598 | 4.871 | 0.23 | 0.72  | 1.82 |
| <i>(bi-HCOO + H<sub>-</sub>O)</i> *            | -308.90 | 13.83 | 18.72 | 7.597 | 4.870 | 0.22 | 0.72  | 1.82 |
| <i>(bi-H<sub>2</sub>CO + H<sub>-</sub>C)</i> * | -304.18 | 12.59 | 13.48 | 6.088 | 4.876 | 0.12 | 0.48  | 1.71 |
| <i>(bi-H<sub>2</sub>CO + H<sub>-</sub>O)</i> * | -304.93 | 12.59 | 13.45 | 6.093 | 4.880 | 0.11 | 0.45  | 1.85 |
| <i>(bi-H<sub>2</sub>CO+OH)</i> *               | -311.87 | 16.03 | 19.79 | 6.497 | 4.880 | 0.16 | 0.79  | 2.02 |
| <i>(bi-H<sub>2</sub>CO+OH+H)</i> *             | -315.78 | 18.23 | 20.88 | 6.936 | 4.885 | 0.19 | 0.88  | 1.92 |
| <i>(bi-H<sub>2</sub>CO+H<sub>2</sub>O)</i> *   | -315.83 | 18.23 | 20.35 | 6.194 | 4.879 | 0.20 | 0.35  | 2.16 |
| <i>(trans-COOH+H)</i> *                        | -308.90 | 13.83 | 18.33 | 8.254 | 4.881 | 0.14 | 0.33  | 1.85 |
| <i>(cis-COOH + H)</i> *                        | -308.50 | 13.83 | 18.27 | 6.365 | 4.887 | 0.32 | 0.27  | 1.89 |
| <i>(H<sub>2</sub>COO+H)</i> *                  | -311.91 | 16.03 | 20.03 | 7.289 | 4.884 | 0.27 | 1.03  | 1.87 |
| <i>(HCOOH+H)</i> *                             | -312.07 | 16.03 | 19.38 | 6.651 | 4.879 | 0.13 | 0.38  | 1.88 |
| <i>(CH<sub>3</sub>O+H)</i> *                   | -308.63 | 14.79 | 14.56 | 6.065 | 4.867 | 0.14 | 0.56  | 1.87 |

---

|              |                      |         |       |       |       |       |      |      |      |
|--------------|----------------------|---------|-------|-------|-------|-------|------|------|------|
|              | $(CH_2OH+H)^*$       | -308.84 | 14.79 | 14.15 | 4.850 | 4.887 | 0.13 | 0.15 | 1.88 |
|              | $CO^*$               | -211.41 | 5.99  | 10.19 | 8.978 | 4.479 | 0.52 | 0.19 | 1.84 |
|              | $CO_2^*$             | -218.75 | 9.43  | 16.07 | 8.865 | 4.479 | 0.50 | 0.07 | 3.69 |
|              | $HCO^*$              | -214.58 | 8.19  | 11.46 | 5.677 | 4.465 | 0.56 | 0.46 | 1.99 |
|              | $bi-HCOO^*$          | -223.24 | 11.63 | 17.67 | 7.669 | 4.479 | 0.51 | 0.67 | 1.99 |
|              | $bi-H_2CO^*$         | -218.43 | 10.39 | 12.79 | 6.191 | 4.478 | 0.60 | 0.79 | 2.16 |
|              | $trans-COOH^*$       | -222.28 | 11.63 | 17.47 | 6.491 | 4.479 | 0.54 | 0.47 | 2.00 |
|              | $cis-COOH^*$         | -222.33 | 11.63 | 17.51 | 6.757 | 4.448 | 0.53 | 0.51 | 2.00 |
|              | $H_2COO^*$           | -226.58 | 13.83 | 19.16 | 7.442 | 4.479 | 0.57 | 1.16 | 1.98 |
|              | $HCOOH^*$            | -225.80 | 13.83 | 18.03 | 6.602 | 4.466 | 0.50 | 0.03 | 2.28 |
|              | $CH_3O^*$            | -222.97 | 12.59 | 13.60 | 6.102 | 4.479 | 0.54 | 0.60 | 1.98 |
|              | $CH_2OH^*$           | -222.15 | 12.59 | 13.34 | 5.329 | 4.448 | 0.53 | 0.34 | 2.08 |
|              | $CH_3OH^*$           | -226.44 | 14.79 | 14.02 | 6.127 | 4.468 | 0.50 | 0.02 | 2.19 |
| <b>Zn-Cu</b> | $(CO + H)^*$         | -214.90 | 8.19  | 11.49 | 7.594 | 4.480 | 0.54 | 0.49 | 1.76 |
|              | $(CO + H_2O)^*$      | -226.14 | 13.83 | 18.22 | 7.113 | 4.479 | 0.52 | 0.22 | 2.05 |
|              | $(CO_2 + H_C)^*$     | -222.27 | 11.63 | 17.37 | 7.565 | 4.479 | 0.52 | 0.37 | 2.69 |
|              | $(CO_2 + H_O)^*$     | -222.26 | 11.63 | 17.36 | 7.602 | 4.479 | 0.52 | 0.36 | 2.73 |
|              | $(HCO + H)^*$        | -218.09 | 10.39 | 12.76 | 5.627 | 4.464 | 0.58 | 0.76 | 1.84 |
|              | $(HCO + OH)^*$       | -225.32 | 13.83 | 19.02 | 6.436 | 4.479 | 0.65 | 1.02 | 2.05 |
|              | $(HCO + OH + H)^*$   | -229.48 | 16.03 | 19.65 | 6.747 | 4.479 | 0.55 | 0.65 | 2.07 |
|              | $(bi-HCOO + H_C)^*$  | -226.76 | 13.83 | 18.95 | 7.496 | 4.479 | 0.54 | 0.95 | 1.84 |
|              | $(bi-HCOO + H_O)^*$  | -226.70 | 13.83 | 18.95 | 7.663 | 4.448 | 0.54 | 0.95 | 1.84 |
|              | $(bi-H_2CO + H_C)^*$ | -221.92 | 12.59 | 14.06 | 6.183 | 4.477 | 0.62 | 1.06 | 1.93 |
|              | $(bi-H_2CO + H_O)^*$ | -221.51 | 12.59 | 14.02 | 6.217 | 4.478 | 0.62 | 1.02 | 1.84 |
|              | $(bi-H_2CO+OH)^*$    | -229.66 | 16.03 | 20.31 | 6.190 | 4.478 | 0.63 | 1.31 | 2.09 |
|              | $(bi-H_2CO+OH+H)^*$  | -232.94 | 18.23 | 21.57 | 6.930 | 4.478 | 0.67 | 1.57 | 1.96 |
|              | $(bi-H_2CO+H_2O)^*$  | -233.18 | 18.23 | 20.82 | 5.998 | 4.477 | 0.62 | 0.82 | 2.19 |

---

|                              |         |       |       |       |       |      |      |      |
|------------------------------|---------|-------|-------|-------|-------|------|------|------|
| <i>(trans-COOH+H)*</i>       | -225.51 | 13.83 | 18.80 | 6.244 | 4.478 | 0.56 | 0.80 | 1.80 |
| <i>(cis-COOH + H)*</i>       | -225.82 | 13.83 | 18.79 | 6.741 | 4.478 | 0.56 | 0.79 | 1.84 |
| <i>(H<sub>2</sub>COO+H)*</i> | -229.99 | 16.03 | 20.45 | 7.486 | 4.479 | 0.60 | 1.45 | 1.83 |
| <i>(HCOOH+H)*</i>            | -229.34 | 16.03 | 19.33 | 6.615 | 4.464 | 0.53 | 0.33 | 1.96 |
| <i>(CH<sub>3</sub>O+H)*</i>  | -226.51 | 14.79 | 14.88 | 6.140 | 4.479 | 0.56 | 0.88 | 1.83 |
| <i>(CH<sub>2</sub>OH+H)*</i> | -225.62 | 14.79 | 14.63 | 5.383 | 4.479 | 0.56 | 0.63 | 1.88 |

---

Table S5. Data statistics used in SISO method for predicting thermodynamic properties research.

| <b>Substrate</b> | <b>Species</b>                                                           | <i>SISO</i> <sub>1</sub> | <i>SISO</i> <sub>2</sub> | <i>SISO</i> <sub>3</sub> | <i>SISO</i> <sub>4</sub> | <i>SISO</i> <sub>5</sub> | <i>SISO</i> <sub>6</sub> | <i>SISO</i> <sub>7</sub> | <i>SISO</i> <sub>8</sub> |
|------------------|--------------------------------------------------------------------------|--------------------------|--------------------------|--------------------------|--------------------------|--------------------------|--------------------------|--------------------------|--------------------------|
| <b>Cu</b>        | <i>CO</i> *                                                              | 0.58                     | 0.004                    | 51.71                    | 55.64                    | 38.02                    | 6.68                     | 8.51                     | -268.52                  |
|                  | <i>CO</i> <sub>2</sub> *                                                 | 0.84                     | 0.001                    | 80.23                    | 87.15                    | 66.94                    | 11.76                    | 15.16                    | -264.80                  |
|                  | <i>HCO</i> *                                                             | 0.65                     | 0.009                    | 44.15                    | 48.12                    | 38.38                    | 6.74                     | 8.53                     | -261.95                  |
|                  | <i>bi-H</i> <sub>2</sub> <i>CO</i> *                                     | 0.75                     | 0.017                    | 62.18                    | 66.39                    | 40.66                    | 7.15                     | 8.98                     | -259.94                  |
|                  | <i>trans-COOH</i> *                                                      | 0.61                     | 0.006                    | 69.93                    | 73.91                    | 38.41                    | 6.75                     | 8.58                     | -271.69                  |
|                  | <i>cis-COOH</i> *                                                        | 0.66                     | 0.010                    | 77.02                    | 81.01                    | 38.49                    | 6.76                     | 8.55                     | -271.37                  |
|                  | <i>CH</i> <sub>2</sub> <i>OH</i> *                                       | 0.61                     | 0.005                    | 60.40                    | 64.49                    | 39.43                    | 6.93                     | 8.83                     | -269.23                  |
|                  | <i>CH</i> <sub>3</sub> <i>OH</i> *                                       | 0.58                     | 0.002                    | 89.07                    | 93.29                    | 40.87                    | 7.18                     | 9.19                     | -280.12                  |
|                  | ( <i>CO</i> + <i>H</i> )*                                                | 0.63                     | 0.011                    | 58.83                    | 62.43                    | 34.85                    | 6.13                     | 7.71                     | -266.56                  |
|                  | ( <i>CO</i> + <i>H</i> <sub>2</sub> <i>O</i> )*                          | 0.62                     | 0.006                    | 93.90                    | 97.95                    | 39.20                    | 6.89                     | 8.76                     | -279.30                  |
|                  | ( <i>CO</i> <sub>2</sub> + <i>H</i> <sub>-</sub> <i>C</i> )*             | 0.74                     | 0.004                    | 85.83                    | 91.13                    | 51.23                    | 9.00                     | 11.52                    | -271.64                  |
|                  | ( <i>CO</i> <sub>2</sub> + <i>H</i> <sub>-</sub> <i>O</i> )*             | 0.70                     | 0.004                    | 84.52                    | 89.46                    | 47.75                    | 8.39                     | 10.72                    | -273.02                  |
|                  | ( <i>HCO</i> + <i>H</i> )*                                               | 0.64                     | 0.012                    | 55.68                    | 59.31                    | 35.01                    | 6.15                     | 7.74                     | -263.93                  |
|                  | ( <i>bi-H</i> <sub>2</sub> <i>CO</i> + <i>H</i> <sub>-</sub> <i>C</i> )* | 0.73                     | 0.021                    | 76.14                    | 79.90                    | 36.32                    | 6.39                     | 7.96                     | -262.58                  |
|                  | ( <i>bi-H</i> <sub>2</sub> <i>CO</i> + <i>H</i> <sub>-</sub> <i>O</i> )* | 0.70                     | 0.019                    | 76.02                    | 79.64                    | 34.98                    | 6.15                     | 7.67                     | -264.82                  |
|                  | ( <i>bi-H</i> <sub>2</sub> <i>CO</i> + <i>H</i> <sub>2</sub> <i>O</i> )* | 0.77                     | 0.019                    | 109.67                   | 113.94                   | 41.21                    | 7.24                     | 9.09                     | -272.86                  |
|                  | ( <i>trans-COOH</i> + <i>H</i> )*                                        | 0.62                     | 0.010                    | 83.85                    | 87.48                    | 35.03                    | 6.16                     | 7.77                     | -274.47                  |
|                  | ( <i>cis-COOH</i> + <i>H</i> )*                                          | 0.66                     | 0.014                    | 92.09                    | 95.72                    | 35.08                    | 6.17                     | 7.74                     | -274.27                  |
|                  | ( <i>CH</i> <sub>2</sub> <i>OH</i> + <i>H</i> )*                         | 0.62                     | 0.009                    | 71.69                    | 75.38                    | 35.62                    | 6.26                     | 7.91                     | -271.56                  |
| <b>Au-Cu</b>     | <i>CO</i> *                                                              | 0.56                     | 0.003                    | 51.48                    | 55.72                    | 49.34                    | 8.11                     | 10.11                    | -255.14                  |
|                  | <i>CO</i> <sub>2</sub> *                                                 | 0.80                     | 0.000                    | 80.28                    | 87.60                    | 85.21                    | 14.00                    | 17.62                    | -239.47                  |
|                  | <i>HCO</i> *                                                             | 0.47                     | 0.001                    | 41.33                    | 45.23                    | 45.38                    | 7.46                     | 9.34                     | -254.21                  |
|                  | <i>bi-H</i> <sub>2</sub> <i>CO</i> *                                     | 0.64                     | 0.003                    | 61.53                    | 66.50                    | 57.70                    | 9.49                     | 11.85                    | -248.82                  |
|                  | <i>trans-COOH</i> *                                                      | 0.58                     | 0.005                    | 67.78                    | 71.97                    | 48.72                    | 8.01                     | 9.95                     | -258.43                  |

|              |                                                    |      |       |        |        |       |       |       |         |
|--------------|----------------------------------------------------|------|-------|--------|--------|-------|-------|-------|---------|
|              | <i>cis</i> -COOH*                                  | 0.50 | 0.002 | 72.07  | 75.96  | 45.16 | 7.42  | 9.28  | -262.30 |
|              | CH <sub>2</sub> OH*                                | 0.62 | 0.009 | 59.91  | 63.92  | 46.53 | 7.65  | 9.46  | -250.09 |
|              | CH <sub>3</sub> OH*                                | 0.56 | 0.003 | 88.56  | 92.82  | 49.57 | 8.15  | 10.17 | -264.45 |
|              | (CO + H)*                                          | 0.51 | 0.004 | 59.75  | 63.31  | 41.41 | 6.81  | 8.44  | -260.86 |
|              | (CO + H <sub>2</sub> O)*                           | 0.60 | 0.006 | 96.75  | 100.97 | 49.07 | 8.07  | 10.01 | -265.67 |
|              | (CO <sub>2</sub> + H <sub>C</sub> )*               | 0.67 | 0.003 | 85.26  | 90.66  | 62.85 | 10.33 | 12.91 | -256.85 |
|              | (CO <sub>2</sub> + H <sub>O</sub> )*               | 0.67 | 0.002 | 84.68  | 90.12  | 63.41 | 10.42 | 13.03 | -256.47 |
|              | (HCO + H)*                                         | 0.51 | 0.004 | 51.43  | 55.09  | 42.61 | 7.00  | 8.70  | -258.78 |
|              | ( <i>bi</i> -H <sub>2</sub> CO + H <sub>C</sub> )* | 0.56 | 0.006 | 74.73  | 78.54  | 44.18 | 7.26  | 9.00  | -261.65 |
|              | ( <i>bi</i> -H <sub>2</sub> CO + H <sub>O</sub> )* | 0.53 | 0.004 | 75.71  | 79.53  | 44.40 | 7.30  | 9.07  | -262.92 |
|              | ( <i>bi</i> -H <sub>2</sub> CO+H <sub>2</sub> O)*  | 0.66 | 0.004 | 102.81 | 107.86 | 58.69 | 9.65  | 12.04 | -260.32 |
|              | ( <i>trans</i> -COOH+H)*                           | 0.56 | 0.006 | 81.58  | 85.38  | 44.20 | 7.26  | 8.99  | -265.30 |
|              | ( <i>cis</i> -COOH + H)*                           | 0.64 | 0.013 | 91.18  | 94.89  | 43.15 | 7.10  | 8.71  | -260.56 |
|              | (CH <sub>2</sub> OH+H)*                            | 0.61 | 0.010 | 69.69  | 73.42  | 43.19 | 7.11  | 8.74  | -255.21 |
|              | CO*                                                | 0.50 | 0.003 | 51.82  | 55.25  | 33.91 | 5.91  | 7.52  | -278.18 |
|              | CO <sub>2</sub> *                                  | 0.64 | 0.009 | 77.34  | 81.31  | 39.12 | 6.83  | 8.61  | -280.56 |
|              | HCO*                                               | 0.74 | 0.022 | 44.94  | 48.73  | 37.40 | 6.52  | 8.11  | -260.16 |
|              | <i>bi</i> -H <sub>2</sub> CO*                      | 0.62 | 0.010 | 62.76  | 66.43  | 36.24 | 6.32  | 7.95  | -275.88 |
|              | <i>trans</i> -COOH*                                | 0.64 | 0.010 | 72.42  | 76.19  | 37.14 | 6.48  | 8.15  | -278.35 |
|              | <i>cis</i> -COOH*                                  | 0.63 | 0.009 | 78.30  | 82.07  | 37.19 | 6.49  | 8.17  | -280.88 |
| <b>Ni-Cu</b> | CH <sub>2</sub> OH*                                | 0.64 | 0.009 | 62.08  | 66.06  | 39.22 | 6.84  | 8.63  | -275.73 |
|              | CH <sub>3</sub> OH*                                | 0.55 | 0.002 | 88.63  | 92.70  | 40.17 | 7.00  | 8.94  | -288.35 |
|              | (CO + H)*                                          | 0.52 | 0.005 | 59.64  | 62.99  | 33.10 | 5.77  | 7.30  | -279.72 |
|              | (CO + H <sub>2</sub> O)*                           | 0.58 | 0.005 | 95.49  | 99.27  | 37.26 | 6.50  | 8.23  | -289.35 |
|              | (CO <sub>2</sub> + H <sub>C</sub> )*               | 0.63 | 0.011 | 86.53  | 90.13  | 35.53 | 6.20  | 7.78  | -282.85 |
|              | (CO <sub>2</sub> + H <sub>O</sub> )*               | 0.63 | 0.011 | 85.46  | 89.06  | 35.51 | 6.20  | 7.78  | -282.37 |
|              | (HCO + H)*                                         | 0.60 | 0.009 | 57.84  | 61.31  | 34.26 | 5.98  | 7.51  | -275.27 |



|              |                      |      |       |        |        |       |      |      |         |
|--------------|----------------------|------|-------|--------|--------|-------|------|------|---------|
|              | $(bi-H_2CO + H_C)^*$ | 0.63 | 0.013 | 75.22  | 78.68  | 34.07 | 5.95 | 7.43 | -277.88 |
|              | $(bi-H_2CO + H_O)^*$ | 0.63 | 0.013 | 76.01  | 79.47  | 34.12 | 5.95 | 7.44 | -278.21 |
|              | $(bi-H_2CO+H_2O)^*$  | 0.69 | 0.012 | 103.99 | 108.06 | 40.13 | 7.00 | 8.80 | -286.16 |
|              | $(trans-COOH+H)^*$   | 0.64 | 0.013 | 86.88  | 90.39  | 34.53 | 6.03 | 7.54 | -281.34 |
|              | $(cis-COOH + H)^*$   | 0.63 | 0.012 | 81.99  | 85.50  | 34.53 | 6.03 | 7.55 | -280.27 |
|              | $(CH_2OH+H)^*$       | 0.63 | 0.012 | 72.69  | 76.30  | 35.67 | 6.22 | 7.80 | -277.97 |
|              | $CO^*$               | 0.84 | 0.033 | 51.62  | 55.72  | 39.86 | 6.99 | 8.65 | -248.37 |
|              | $CO_2^*$             | 0.59 | 0.003 | 77.24  | 81.36  | 39.93 | 7.01 | 8.95 | -277.06 |
|              | $HCO^*$              | 0.58 | 0.002 | 41.66  | 45.86  | 40.73 | 7.15 | 9.15 | -266.61 |
|              | $bi-H_2CO^*$         | 0.53 | 0.001 | 61.68  | 65.72  | 39.17 | 6.88 | 8.83 | -273.51 |
|              | $trans-COOH^*$       | 0.58 | 0.003 | 68.86  | 72.93  | 39.51 | 6.93 | 8.85 | -275.67 |
|              | $cis-COOH^*$         | 0.62 | 0.003 | 74.24  | 78.63  | 42.59 | 7.47 | 9.55 | -276.06 |
|              | $CH_2OH^*$           | 0.58 | 0.003 | 56.61  | 60.80  | 40.62 | 7.13 | 9.11 | -271.87 |
|              | $CH_3OH^*$           | 0.57 | 0.002 | 89.07  | 93.32  | 41.24 | 7.24 | 9.29 | -281.19 |
|              | $(CO + H)^*$         | 0.82 | 0.035 | 59.40  | 63.13  | 36.40 | 6.37 | 7.84 | -250.90 |
| <b>Pd-Cu</b> | $(CO + H_2O)^*$      | 0.89 | 0.034 | 94.95  | 99.39  | 43.23 | 7.58 | 9.41 | -259.29 |
|              | $(CO_2 + H_C)^*$     | 0.60 | 0.006 | 91.96  | 95.79  | 37.15 | 6.52 | 8.27 | -282.48 |
|              | $(CO_2 + H_O)^*$     | 0.60 | 0.006 | 92.50  | 96.33  | 37.16 | 6.52 | 8.27 | -282.58 |
|              | $(HCO + H)^*$        | 0.57 | 0.004 | 54.16  | 57.97  | 36.92 | 6.48 | 8.24 | -272.10 |
|              | $(bi-H_2CO + H_C)^*$ | 0.60 | 0.008 | 75.14  | 78.84  | 35.88 | 6.30 | 7.97 | -275.99 |
|              | $(bi-H_2CO + H_O)^*$ | 0.54 | 0.003 | 75.30  | 79.00  | 35.91 | 6.30 | 8.03 | -279.51 |
|              | $(bi-H_2CO+H_2O)^*$  | 0.58 | 0.002 | 106.47 | 110.65 | 40.53 | 7.12 | 9.10 | -286.68 |
|              | $(trans-COOH+H)^*$   | 0.58 | 0.005 | 81.95  | 85.78  | 37.29 | 6.54 | 8.32 | -281.06 |
|              | $(cis-COOH + H)^*$   | 0.61 | 0.005 | 89.24  | 93.23  | 38.87 | 6.81 | 8.66 | -282.59 |
|              | $(CH_2OH+H)^*$       | 0.57 | 0.005 | 64.89  | 68.69  | 36.95 | 6.48 | 8.24 | -275.80 |
|              | $CO^*$               | 0.80 | 0.029 | 51.93  | 56.02  | 48.93 | 7.96 | 9.62 | -294.73 |
| <b>Pt-Cu</b> | $CO_2^*$             | 0.50 | 0.001 | 78.51  | 82.54  | 47.95 | 7.82 | 9.75 | -304.58 |

|              |                                               |      |       |        |        |       |       |       |         |
|--------------|-----------------------------------------------|------|-------|--------|--------|-------|-------|-------|---------|
|              | <i>HCO*</i>                                   | 0.50 | 0.002 | 39.44  | 43.36  | 47.00 | 7.64  | 9.49  | -315.44 |
|              | <i>bi-H<sub>2</sub>CO*</i>                    | 0.49 | 0.001 | 61.68  | 65.68  | 47.54 | 7.76  | 9.68  | -296.24 |
|              | <i>trans-COOH*</i>                            | 0.54 | 0.003 | 68.28  | 72.28  | 47.46 | 7.75  | 9.63  | -292.84 |
|              | <i>cis-COOH*</i>                              | 0.50 | 0.002 | 72.01  | 75.97  | 47.29 | 7.70  | 9.59  | -309.19 |
|              | <i>CH<sub>2</sub>OH*</i>                      | 0.52 | 0.002 | 57.90  | 62.06  | 49.22 | 8.04  | 10.02 | -290.18 |
|              | <i>CH<sub>3</sub>OH*</i>                      | 0.50 | 0.001 | 88.58  | 92.75  | 49.50 | 8.07  | 10.09 | -308.15 |
|              | <i>(CO + H)*</i>                              | 0.77 | 0.030 | 59.37  | 63.12  | 44.78 | 7.28  | 8.77  | -291.20 |
|              | <i>(CO + H<sub>2</sub>O)*</i>                 | 0.84 | 0.030 | 96.35  | 100.78 | 52.73 | 8.59  | 10.41 | -297.32 |
|              | <i>(CO<sub>2</sub> + H<sub>-</sub>C)*</i>     | 0.50 | 0.004 | 85.74  | 89.34  | 42.94 | 7.00  | 8.66  | -310.50 |
|              | <i>(CO<sub>2</sub> + H<sub>-</sub>O)*</i>     | 0.49 | 0.002 | 85.00  | 88.71  | 44.24 | 7.21  | 8.96  | -310.29 |
|              | <i>(HCO + H)*</i>                             | 0.50 | 0.003 | 50.38  | 54.04  | 43.78 | 7.12  | 8.83  | -306.14 |
|              | <i>(bi-H<sub>2</sub>CO + H<sub>-</sub>C)*</i> | 0.47 | 0.003 | 74.94  | 78.36  | 40.69 | 6.63  | 8.22  | -302.53 |
|              | <i>(bi-H<sub>2</sub>CO + H<sub>-</sub>O)*</i> | 0.49 | 0.002 | 74.86  | 78.56  | 44.04 | 7.18  | 8.91  | -306.98 |
|              | <i>(bi-H<sub>2</sub>CO+H<sub>2</sub>O)*</i>   | 0.65 | 0.009 | 110.76 | 115.08 | 51.44 | 8.38  | 10.34 | -315.15 |
|              | <i>(trans-COOH+H)*</i>                        | 0.52 | 0.004 | 112.30 | 116.00 | 44.10 | 7.18  | 8.89  | -319.00 |
|              | <i>(cis-COOH + H)*</i>                        | 0.71 | 0.022 | 86.14  | 89.92  | 45.19 | 7.35  | 8.92  | -303.30 |
|              | <i>(CH<sub>2</sub>OH+H)*</i>                  | 0.52 | 0.003 | 69.85  | 73.62  | 45.00 | 7.32  | 9.08  | -311.85 |
| <b>Zn-Cu</b> | <i>CO*</i>                                    | 0.93 | 0.060 | 51.94  | 55.62  | 36.93 | 6.40  | 7.73  | -227.95 |
|              | <i>CO<sub>2</sub>*</i>                        | 1.32 | 0.055 | 79.91  | 87.28  | 73.94 | 12.82 | 16.01 | -228.02 |
|              | <i>HCO*</i>                                   | 1.00 | 0.070 | 44.51  | 48.48  | 39.62 | 6.89  | 8.32  | -216.47 |
|              | <i>bi-H<sub>2</sub>CO*</i>                    | 1.09 | 0.081 | 62.16  | 66.48  | 43.31 | 7.51  | 9.07  | -209.14 |
|              | <i>trans-COOH*</i>                            | 0.98 | 0.064 | 73.49  | 77.49  | 40.18 | 6.97  | 8.44  | -229.77 |
|              | <i>cis-COOH*</i>                              | 0.98 | 0.064 | 76.58  | 80.59  | 39.64 | 6.91  | 8.38  | -232.26 |
|              | <i>CH<sub>2</sub>OH*</i>                      | 1.00 | 0.064 | 65.01  | 69.17  | 41.19 | 7.18  | 8.73  | -227.79 |
|              | <i>CH<sub>3</sub>OH*</i>                      | 0.99 | 0.057 | 88.43  | 92.81  | 43.74 | 7.60  | 9.29  | -240.75 |
|              | <i>(CO + H)*</i>                              | 0.93 | 0.065 | 60.43  | 63.96  | 35.39 | 6.14  | 7.36  | -225.99 |
|              | <i>(CO + H<sub>2</sub>O)*</i>                 | 0.98 | 0.060 | 96.32  | 100.42 | 41.11 | 7.13  | 8.66  | -240.03 |

---

|                      |      |       |        |        |       |      |       |         |
|----------------------|------|-------|--------|--------|-------|------|-------|---------|
| $(CO_2 + H_C)^*$     | 1.12 | 0.061 | 85.29  | 90.67  | 54.02 | 9.37 | 11.54 | -231.23 |
| $(CO_2 + H_O)^*$     | 1.13 | 0.061 | 85.68  | 91.15  | 54.85 | 9.51 | 11.72 | -231.35 |
| $(HCO + H)^*$        | 0.99 | 0.074 | 56.63  | 60.30  | 36.61 | 6.36 | 7.63  | -216.98 |
| $(bi-H_2CO + H_C)^*$ | 1.05 | 0.086 | 75.91  | 79.77  | 38.67 | 6.71 | 8.02  | -210.51 |
| $(bi-H_2CO + H_O)^*$ | 1.03 | 0.087 | 76.43  | 80.11  | 36.94 | 6.41 | 7.62  | -210.79 |
| $(bi-H_2CO+H_2O)^*$  | 1.11 | 0.087 | 107.16 | 111.53 | 43.81 | 7.60 | 9.16  | -218.57 |
| $(trans-COOH+H)^*$   | 0.96 | 0.069 | 84.56  | 88.15  | 36.03 | 6.25 | 7.49  | -229.96 |
| $(cis-COOH + H)^*$   | 0.97 | 0.070 | 91.38  | 95.07  | 36.98 | 6.41 | 7.70  | -231.11 |
| $(CH_2OH+H)^*$       | 0.98 | 0.069 | 77.73  | 81.50  | 37.75 | 6.55 | 7.87  | -227.31 |

---

Table S6. Linear performance ( $PCC$ ) of CO&O and CHO&CH<sub>3</sub>OH descriptors in the data of [29].

| Intermediate       | CO&O  | CHO&CH <sub>3</sub> OH |
|--------------------|-------|------------------------|
| H                  | 0.988 | 0.997                  |
| CO                 | 0.948 | 0.967                  |
| CO <sub>2</sub>    | 0.991 | 0.994                  |
| O                  | 0.989 | 0.972                  |
| OH                 | 0.857 | 0.861                  |
| H <sub>2</sub> O   | 0.986 | 0.979                  |
| CHO                | 0.995 | 0.997                  |
| CH <sub>2</sub> O  | 0.745 | 0.741                  |
| CH <sub>3</sub> O  | 0.328 | 0.387                  |
| CH <sub>3</sub> OH | 0.959 | 0.977                  |

Table S7. Linear performance ( $PCC$ ) of CO&O and CHO&CH<sub>3</sub>OH descriptors in the data of [64].

| Intermediate        | CO&O  | CHO&CH <sub>3</sub> OH |
|---------------------|-------|------------------------|
| H                   | 0.906 | 0.927                  |
| O                   | 0.971 | 0.982                  |
| C                   | 0.992 | 0.997                  |
| CO <sub>2</sub>     | 0.998 | 1.000                  |
| H <sub>2</sub> O    | 0.964 | 0.977                  |
| COOH                | 0.999 | 1.000                  |
| HCOO                | 0.987 | 0.994                  |
| HCOOH               | 0.985 | 0.993                  |
| CH <sub>2</sub> OH  | 0.993 | 0.998                  |
| H <sub>2</sub> COOH | 0.991 | 0.996                  |
| CH <sub>3</sub> OH  | 0.957 | 0.971                  |
