# Supplementary material for: A systematic theoretical study of CO2 hydrogenation towards methanol on Cu-based bimetallic catalysts: role of the CHO&CH3OH descriptor in thermodynamic analysis
Source: Royal Society of Chemistry journal article supplement (doi:10.1039/d4cp01009d), 2024-01-01
Supplement: d4cp01009d2.xlsx [file d4cp01009d2.xlsx]

## Sheet: Sheet1
				Ead / eV	Substrate+Adsorbate / eV	Calculation_Time / s	Calculation_Time / h	Substrate / eV	Adsorbate / eV
	Cu	H	Top	-2.02155	-234.143	4848.71	1.34686	-231.004	-1.11665
			Long Bridge	-2.41099	-234.532	8951.75	2.4866	-231.004	-1.11665
			Short Bridge	-2.5595	-234.681	7864.58	2.1846	-231.004	-1.11665
			Hollow	-2.51268	-234.634	17316.3	4.81008	-231.004	-1.11665
		O	Top	-5.20934	-237.758	53363.7	14.8233	-231.004	-1.54391
			Long Bridge	-5.08745	-237.636	11927.3	3.31315	-231.004	-1.54391
			Short Bridge	-4.89633	-237.445	10782.9	2.99526	-231.004	-1.54391
			Hollow	-5.14251	-237.691	10594	2.94276	-231.004	-1.54391
		H2	Top	-0.147276	-237.921	9037.88	2.51052	-231.004	-6.76902
			Long Bridge	-0.0590925	-237.833	21636.9	6.01026	-231.004	-6.76902
			Short Bridge	-0.0642228	-237.838	17837.8	4.95494	-231.004	-6.76902
			Hollow	-0.0748272	-237.848	40848.6	11.3468	-231.004	-6.76902
		OH	Top	-3.76136	-242.308	120767	33.5464	-231.004	-7.54198
			Long Bridge	-3.44276	-241.989	42402.9	11.7786	-231.004	-7.54198
			Short Bridge	-3.76034	-242.307	55791.2	15.4976	-231.004	-7.54198
			Hollow	-3.76142	-242.308	63585.3	17.6626	-231.004	-7.54198
		H2O	Top	-0.545712	-245.779	118353	32.8757	-231.004	-14.2284
			Long Bridge	-0.595924	-245.829	157148	43.6523	-231.004	-14.2284
			Short Bridge	-0.477203	-245.71	29044.7	8.06798	-231.004	-14.2284
			Hollow	-0.511192	-245.744	130600	36.2776	-231.004	-14.2284
		CO	Top	-1.15214	-246.947	36875.3	10.2432	-231.004	-14.7905
			Long Bridge	-0.822813	-246.618	7476.28	2.07674	-231.004	-14.7905
			Short Bridge	-1.23235	-247.027	16576.1	4.60447	-231.004	-14.7905
			Hollow	-1.2269	-247.022	129092	35.8588	-231.004	-14.7905
		CO2	Top	-0.191728	-254.18	109639	30.4554	-231.004	-22.9837
			Long Bridge	-0.232527	-254.221	35090.8	9.74745	-231.004	-22.9837
			Short Bridge	-0.195095	-254.183	95593.4	26.5537	-231.004	-22.9837
			Hollow	-0.226743	-254.215	139393	38.7202	-231.004	-22.9837
		HCO	Top	-1.74925	-249.852	44224.6	12.2846	-231.004	-17.0981
			Long Bridge	-2.03821	-250.141	102941	28.5946	-231.004	-17.0981
			Short Bridge	-1.81227	-249.915	27454.3	7.62618	-231.004	-17.0981
			Hollow	-1.52325	-249.626	41306.3	11.474	-231.004	-17.0981
		mono-HCOO	Top	-3.65357	-258.747	162617	45.1714	-231.004	-24.0894
			Long Bridge	-3.65362	-258.747	163331	45.3696	-231.004	-24.0894
			Short Bridge	-3.65353	-258.747	290250	80.6249	-231.004	-24.0894
			Hollow	-3.65321	-258.747	235714	65.4762	-231.004	-24.0894
		bi-HCOO	Top	-2.80757	-257.901	33645.2	9.34588	-231.004	-24.0894
			Long Bridge	-3.65367	-258.747	44539.8	12.3722	-231.004	-24.0894
			Short Bridge	-3.6822	-258.776	35777.8	9.93829	-231.004	-24.0894
			Hollow	-3.55819	-258.652	40063	11.1286	-231.004	-24.0894
		mono-H2CO	Top	-0.378235	-253.547	34001.8	9.44495	-231.004	-22.1645
			Long Bridge	-0.170257	-253.339	59120	16.4222	-231.004	-22.1645
			Short Bridge	-0.275195	-253.444	23164.4	6.43456	-231.004	-22.1645
			Hollow	-1.02492	-254.194	193596	53.7767	-231.004	-22.1645
		bi-H2CO	Top	-0.782328	-253.951	171216	47.56	-231.004	-22.1645
			Long Bridge	-1.02482	-254.194	135805	37.7236	-231.004	-22.1645
			Short Bridge	-0.781847	-253.951	153874	42.7428	-231.004	-22.1645
			Hollow	-1.02493	-254.194	29393.2	8.16477	-231.004	-22.1645
		trans-COOH	Top	-2.05577	-257.544	47169.8	13.1027	-231.004	-24.4839
			Long Bridge	-2.34605	-257.834	170023	47.2287	-231.004	-24.4839
			Short Bridge	-2.13872	-257.627	39568.1	10.9911	-231.004	-24.4839
			Hollow	-2.34993	-257.838	234221	65.0613	-231.004	-24.4839
		cis-COOH	Top	-2.15031	-257.552	55610.7	15.4474	-231.004	-24.3973
			Long Bridge	-2.52511	-257.927	365282	101.467	-231.004	-24.3973
			Short Bridge	-2.22205	-257.624	52539.5	14.5943	-231.004	-24.3973
			Hollow	-2.52868	-257.93	270435	75.1209	-231.004	-24.3973
		H2COO	Top	-4.3201	-260.995	67974.9	18.8819	-231.004	-25.6707
			Long Bridge	-5.48545	-262.161	134832	37.4535	-231.004	-25.6707
			Short Bridge	-4.17597	-260.851	30309	8.41917	-231.004	-25.6707
			Hollow	-5.48545	-262.161	27064.1	7.51782	-231.004	-25.6707
		HCOOH	Top	-0.50105	-261.279	235608	65.4466	-231.004	-29.7739
			Long Bridge	-0.614255	-261.393	360178	100.049	-231.004	-29.7739
			Short Bridge	-0.255314	-261.034	82165.3	22.8237	-231.004	-29.7739
			Hollow	-0.61887	-261.397	541977	150.549	-231.004	-29.7739
		CH3O	Top	-2.9518	-258.466	254274	70.6316	-231.004	-24.5093
			Long Bridge	-2.56918	-258.083	40396.7	11.2213	-231.004	-24.5093
			Short Bridge	-2.9507	-258.464	146417	40.6713	-231.004	-24.5093
			Hollow	-2.95131	-258.465	149416	41.5045	-231.004	-24.5093
		H2COH	Top	-1.8222	-257.719	156173	43.3813	-231.004	-24.8921
			Long Bridge	-1.72191	-257.618	121153	33.6535	-231.004	-24.8921
			Short Bridge	-1.82093	-257.717	146433	40.6758	-231.004	-24.8921
			Hollow	-1.7587	-257.655	76525.2	21.257	-231.004	-24.8921
		CH3OH	Top	-0.592834	-261.859	70769.9	19.6583	-231.004	-30.2615
			Long Bridge	-0.731733	-261.998	4660.04	1.29446	-231.004	-30.2615
			Short Bridge	-0.705236	-261.971	369623	102.673	-231.004	-30.2615
			Hollow	-0.705093	-261.971	166207	46.1686	-231.004	-30.2615
	Cu/Au	H	Top	-2.05007	-233.937	19523.3	5.42313	-230.77	-1.11665
			Long Bridge	-2.12719	-234.014	10302.7	2.86187	-230.77	-1.11665
			Short Bridge	-2.37922	-234.266	11849.2	3.29145	-230.77	-1.11665
			Hollow	-2.27062	-234.157	35556.5	9.8768	-230.77	-1.11665
		O	Top	-3.97882	-236.293	94401.2	26.2225	-230.77	-1.54391
			Long Bridge	-3.49597	-235.81	28394.8	7.88744	-230.77	-1.54391
			Short Bridge	-3.9786	-236.292	24538.6	6.81627	-230.77	-1.54391
			Hollow	-4.62778	-236.942	42603.2	11.8342	-230.77	-1.54391
		H2	Top	-0.0571557	-237.596	48321.5	13.4226	-230.77	-6.76902
			Long Bridge	-0.0566839	-237.596	43392.5	12.0535	-230.77	-6.76902
			Short Bridge	-0.0601551	-237.599	57430.6	15.9529	-230.77	-6.76902
			Hollow	-0.0608891	-237.6	71200.7	19.778	-230.77	-6.76902
		OH	Top	-3.09086	-241.403	179020	49.7278	-230.77	-7.54198
			Long Bridge	-2.61018	-240.922	73497.9	20.4161	-230.77	-7.54198
			Short Bridge	-3.09082	-241.403	80334.2	22.315	-230.77	-7.54198
			Hollow	-3.09085	-241.403	82489.6	22.9138	-230.77	-7.54198
		H2O	Top	-0.266048	-245.264	101828	28.2856	-230.77	-14.2284
			Long Bridge	-0.344267	-245.343	160547	44.5964	-230.77	-14.2284
			Short Bridge	-0.509615	-245.508	81407.2	22.6131	-230.77	-14.2284
			Hollow	-0.590245	-245.589	203959	56.6552	-230.77	-14.2284
		CO	Top	4.8012	-240.759	172349	47.8747	-230.77	-14.7905
			Long Bridge	-0.522178	-246.083	66647.4	18.5132	-230.77	-14.7905
			Short Bridge	-0.985678	-246.546	71179.4	19.772	-230.77	-14.7905
			Hollow	-0.751927	-246.312	11222.8	3.11744	-230.77	-14.7905
		CO2	Top	-0.186282	-253.94	157598	43.7773	-230.77	-22.9837
			Long Bridge	-0.237169	-253.991	10841.7	3.01157	-230.77	-22.9837
			Short Bridge	-0.208002	-253.961	102288	28.4132	-230.77	-22.9837
			Hollow	-0.253751	-254.007	135951	37.7642	-230.77	-22.9837
		HCO	Top	-1.69111	-249.559	76481.7	21.2449	-230.77	-17.0981
			Long Bridge	-1.68609	-249.554	249118	69.1996	-230.77	-17.0981
			Short Bridge	-1.72723	-249.595	192237	53.3993	-230.77	-17.0981
			Hollow	-1.22193	-249.09	71820.7	19.9502	-230.77	-17.0981
		mono-HCOO	Top	-2.11579	-256.975	127955	35.543	-230.77	-24.0894
			Long Bridge	-2.07019	-256.929	126905	35.2514	-230.77	-24.0894
			Short Bridge	-2.96528	-257.825	174826	48.5628	-230.77	-24.0894
			Hollow	-2.96042	-257.82	230097	63.9159	-230.77	-24.0894
		bi-HCOO	Top	-2.11677	-256.976	69009.5	19.1693	-230.77	-24.0894
			Long Bridge	-0.887278	-255.746	344822	95.784	-230.77	-24.0894
			Short Bridge	-2.96613	-257.825	108187	30.0519	-230.77	-24.0894
			Hollow	-3.28652	-258.146	139276	38.6879	-230.77	-24.0894
		mono-H2CO	Top	-0.36396	-253.298	523012	145.281	-230.77	-22.1645
			Long Bridge	-0.368954	-253.303	318544	88.4844	-230.77	-22.1645
			Short Bridge	-0.533529	-253.468	157973	43.8813	-230.77	-22.1645
			Hollow	-0.565419	-253.5	281142	78.0951	-230.77	-22.1645
		bi-H2CO	Top	-0.257159	-253.191	140536	39.0378	-230.77	-22.1645
			Long Bridge	-0.369114	-253.303	356038	98.8995	-230.77	-22.1645
			Short Bridge	-0.525284	-253.46	91431.9	25.3978	-230.77	-22.1645
			Hollow	-0.544686	-253.479	188372	52.3255	-230.77	-22.1645
		trans-COOH	Top	-1.8851	-257.139	126920	35.2555	-230.77	-24.4839
			Long Bridge	-1.97716	-257.231	282917	78.588	-230.77	-24.4839
			Short Bridge	-1.96175	-257.216	132113	36.6981	-230.77	-24.4839
			Hollow	-1.96475	-257.219	440857	122.46	-230.77	-24.4839
		cis-COOH	Top	-1.90475	-257.072	120548	33.4857	-230.77	-24.3973
			Long Bridge	-1.88652	-257.054	236579	65.7164	-230.77	-24.3973
			Short Bridge	-2.0205	-257.188	184217	51.1715	-230.77	-24.3973
			Hollow	-2.02472	-257.192	756595	210.165	-230.77	-24.3973
		H2COO	Top	-2.85994	-259.3	178079	49.4664	-230.77	-25.6707
			Long Bridge	-4.17299	-260.614	167556	46.5432	-230.77	-25.6707
			Short Bridge	-3.22586	-259.666	206010	57.2249	-230.77	-25.6707
			Hollow	-4.17374	-260.614	147518	40.9773	-230.77	-25.6707
		HCOOH	Top	-0.235472	-260.779	393277	109.244	-230.77	-29.7739
			Long Bridge	-0.241857	-260.786	421829	117.175	-230.77	-29.7739
			Short Bridge	-0.482125	-261.026	431307	119.808	-230.77	-29.7739
			Hollow	-0.60064	-261.144	538110	149.475	-230.77	-29.7739
		CH3O	Top	-2.30702	-257.586	549731	152.703	-230.77	-24.5093
			Long Bridge	-1.80403	-257.083	219333	60.9259	-230.77	-24.5093
			Short Bridge	-2.30696	-257.586	381566	105.991	-230.77	-24.5093
			Hollow	-2.38054	-257.66	312219	86.7274	-230.77	-24.5093
		H2COH	Top	-0.93654	-256.599	38732.4	10.759	-230.77	-24.8921
			Long Bridge	-1.53163	-257.194	85738.6	23.8163	-230.77	-24.8921
			Short Bridge	-1.09169	-256.754	204455	56.793	-230.77	-24.8921
			Hollow	-1.59544	-257.257	115149	31.9858	-230.77	-24.8921
		CH3OH	Top	-0.371431	-261.403	108468	30.1299	-230.77	-30.2615
			Long Bridge	-0.475348	-261.507	194984	54.1622	-230.77	-30.2615
			Short Bridge	-0.590821	-261.622	22940.7	6.37243	-230.77	-30.2615
			Hollow	-0.694601	-261.726	115166	31.9906	-230.77	-30.2615
	Cu/Ni	H	Top	-2.32374	-256.697	25584.7	7.10687	-253.257	-1.11665
			Long Bridge	-2.81739	-257.191	35953.1	9.98696	-253.257	-1.11665
			Short Bridge	-2.81695	-257.19	31803.3	8.83425	-253.257	-1.11665
			Hollow	-2.81678	-257.19	42611.7	11.8366	-253.257	-1.11665
		O	Top	-4.59828	-259.399	35863.2	9.96201	-253.257	-1.54391
			Long Bridge	-5.71823	-260.519	50245.6	13.9571	-253.257	-1.54391
			Short Bridge	-5.48905	-260.29	47916.9	13.3102	-253.257	-1.54391
			Hollow	-5.71534	-260.516	78486.5	21.8018	-253.257	-1.54391
		H2	Top	-0.734745	-260.76	20762	5.76721	-253.257	-6.76902
			Long Bridge	-0.696681	-260.722	66138.1	18.3717	-253.257	-6.76902
			Short Bridge	-0.853376	-260.879	129577	35.9937	-253.257	-6.76902
			Hollow	-1.08615	-261.112	87149.9	24.2083	-253.257	-6.76902
		OH	Top	-4.0154	-264.814	222632	61.8423	-253.257	-7.54198
			Long Bridge	-3.83352	-264.632	90739.9	25.2055	-253.257	-7.54198
			Short Bridge	-4.01453	-264.813	105533	29.3147	-253.257	-7.54198
			Hollow	-4.01586	-264.814	127566	35.4351	-253.257	-7.54198
		H2O	Top	-0.711883	-268.197	147555	40.9874	-253.257	-14.2284
			Long Bridge	-0.790657	-268.276	219017	60.838	-253.257	-14.2284
			Short Bridge	-0.713395	-268.198	197435	54.8431	-253.257	-14.2284
			Hollow	-0.79064	-268.276	453666	126.018	-253.257	-14.2284
		CO	Top	-2.25775	-270.305	50709.2	14.0859	-253.257	-14.7905
			Long Bridge	-2.22345	-270.271	96970.8	26.9363	-253.257	-14.7905
			Short Bridge	-2.25343	-270.301	204908	56.9188	-253.257	-14.7905
			Hollow	-2.22294	-270.27	227208	63.1134	-253.257	-14.7905
		CO2	Top	-1.1414	-277.382	482254	133.959	-253.257	-22.9837
			Long Bridge	-1.14086	-277.381	684369	190.103	-253.257	-22.9837
			Short Bridge	-1.14207	-277.382	82573.6	22.9371	-253.257	-22.9837
			Hollow	-1.0849	-277.325	338809	94.1136	-253.257	-22.9837
		HCO	Top	-3.82893	-274.184	529693	147.137	-253.257	-17.0981
			Long Bridge	-2.92352	-273.278	346477	96.2436	-253.257	-17.0981
			Short Bridge	-3.80533	-274.16	511133	141.981	-253.257	-17.0981
			Hollow	-3.71091	-274.066	545496	151.527	-253.257	-17.0981
		mono-HCOO	Top	-4.23466	-281.581	139379	38.7164	-253.257	-24.0894
			Long Bridge	-4.23495	-281.581	507986	141.107	-253.257	-24.0894
			Short Bridge	-4.23079	-281.577	3640.43	1.01123	-253.257	-24.0894
			Hollow	-3.6903	-281.036	3943.24	1.09535	-253.257	-24.0894
		bi-HCOO	Top	-3.14932	-280.495	10132.1	2.81447	-253.257	-24.0894
			Long Bridge	-4.23466	-281.581	3938.78	1.09411	-253.257	-24.0894
			Short Bridge	-3.92716	-281.273	3832.51	1.06458	-253.257	-24.0894
			Hollow	-4.23402	-281.58	3795.81	1.05439	-253.257	-24.0894
		mono-H2CO	Top	-0.899352	-276.32	3468.11	0.963363	-253.257	-22.1645
			Long Bridge	-0.619314	-276.04	3592.56	0.997934	-253.257	-22.1645
			Short Bridge	-1.51186	-276.933	3639.47	1.01096	-253.257	-22.1645
			Hollow	-1.53701	-276.958	3464.64	0.9624	-253.257	-22.1645
		bi-H2CO	Top	-1.46401	-276.885	3340.7	0.927971	-253.257	-22.1645
			Long Bridge	-1.75335	-277.174	3303.08	0.917522	-253.257	-22.1645
			Short Bridge	-1.39061	-276.812	3238.74	0.899651	-253.257	-22.1645
			Hollow	-1.72026	-277.141	3702.8	1.02856	-253.257	-22.1645
		trans-COOH	Top	-2.6727	-280.413	3501.25	0.97257	-253.257	-24.4839
			Long Bridge	-3.23246	-280.973	3609.45	1.00263	-253.257	-24.4839
			Short Bridge	-2.71239	-280.453	3437.29	0.954803	-253.257	-24.4839
			Hollow	-3.23242	-280.973	3507.45	0.974291	-253.257	-24.4839
		cis-COOH	Top	-3.03569	-280.69	3455.59	0.959887	-253.257	-24.3973
			Long Bridge	-3.29783	-280.952	3671.49	1.01986	-253.257	-24.3973
			Short Bridge	-2.72116	-280.375	3391.32	0.942032	-253.257	-24.3973
			Hollow	-3.29454	-280.948	3391.31	0.942032	-253.257	-24.3973
		H2COO	Top	-4.81622	-283.744	4182.69	1.16186	-253.257	-25.6707
			Long Bridge	-5.14256	-284.07	12910	3.58612	-253.257	-25.6707
			Short Bridge	-4.51651	-283.444	3688.38	1.02455	-253.257	-25.6707
			Hollow	-5.85268	-284.78	3552.87	0.986908	-253.257	-25.6707
		HCOOH	Top	-1.02671	-284.057	3433.08	0.953634	-253.257	-29.7739
			Long Bridge	-1.8012	-284.832	3381.08	0.939188	-253.257	-29.7739
			Short Bridge	-1.06506	-284.096	3711.92	1.03109	-253.257	-29.7739
			Hollow	-1.09737	-284.128	3406.41	0.946226	-253.257	-29.7739
		CH3O	Top	-3.23907	-281.005	3498.23	0.971731	-253.257	-24.5093
			Long Bridge	-3.01845	-280.784	4095.73	1.1377	-253.257	-24.5093
			Short Bridge	-3.23812	-281.004	3430.85	0.953013	-253.257	-24.5093
			Hollow	-3.01597	-280.782	11150.1	3.09724	-253.257	-24.5093
		H2COH	Top	-2.27471	-280.423	3323.02	0.923061	-253.257	-24.8921
			Long Bridge	-2.33405	-280.483	3292.31	0.914531	-253.257	-24.8921
			Short Bridge	-2.27541	-280.424	3372.88	0.936911	-253.257	-24.8921
			Hollow	-2.25382	-280.403	3370.39	0.936221	-253.257	-24.8921
		CH3OH	Top	-0.784921	-284.303	3460.16	0.961156	-253.257	-30.2615
			Long Bridge	-0.940726	-284.459	3543.49	0.984302	-253.257	-30.2615
			Short Bridge	-0.942356	-284.46	3416.24	0.948956	-253.257	-30.2615
			Hollow	-0.94112	-284.459	3375.96	0.937768	-253.257	-30.2615
	Cu/Pd	H	Top	-2.17813	-265.697	16728	4.64667	-262.402	-1.11665
			Long Bridge	-2.62839	-266.148	21857	6.0714	-262.402	-1.11665
			Short Bridge	-2.68217	-266.201	18178	5.04944	-262.402	-1.11665
			Hollow	-2.63167	-266.151	36838.9	10.233	-262.402	-1.11665
		O	Top	-4.52663	-268.473	124456	34.5712	-262.402	-1.54391
			Long Bridge	-4.8805	-268.827	74547.2	20.7076	-262.402	-1.54391
			Short Bridge	-4.52686	-268.473	23261.1	6.46143	-262.402	-1.54391
			Hollow	-4.88057	-268.827	41215.9	11.4489	-262.402	-1.54391
		H2	Top	-0.461621	-269.633	23693.8	6.58161	-262.402	-6.76902
			Long Bridge	-0.304267	-269.476	27755.5	7.70986	-262.402	-6.76902
			Short Bridge	-0.515644	-269.687	123237	34.2325	-262.402	-6.76902
			Hollow	-0.51524	-269.687	143898	39.9717	-262.402	-6.76902
		OH	Top	-3.46787	-273.412	181321	50.3669	-262.402	-7.54198
			Long Bridge	-3.06617	-273.011	63556.6	17.6546	-262.402	-7.54198
			Short Bridge	-3.46885	-273.413	109859	30.5165	-262.402	-7.54198
			Hollow	-3.46799	-273.412	105022	29.1727	-262.402	-7.54198
		H2O	Top	-0.449739	-277.081	275055	76.4041	-262.402	-14.2284
			Long Bridge	-0.546286	-277.177	339650	94.3473	-262.402	-14.2284
			Short Bridge	-0.574466	-277.205	261778	72.7162	-262.402	-14.2284
			Hollow	-0.629368	-277.26	11231.6	3.11989	-262.402	-14.2284
		CO	Top	-1.66342	-278.856	128908	35.8078	-262.402	-14.7905
			Long Bridge	-1.77458	-278.968	110895	30.8043	-262.402	-14.7905
			Short Bridge	-1.75856	-278.952	93673.7	26.0205	-262.402	-14.7905
			Hollow	-1.77311	-278.966	275348	76.4857	-262.402	-14.7905
		CO2	Top	-0.226857	-285.613	120528	33.4799	-262.402	-22.9837
			Long Bridge	-0.263052	-285.649	260212	72.2811	-262.402	-22.9837
			Short Bridge	-0.221772	-285.608	422229	117.286	-262.402	-22.9837
			Hollow	-0.433726	-285.82	288776	80.2157	-262.402	-22.9837
		HCO	Top	-2.30512	-281.806	319301	88.6949	-262.402	-17.0981
			Long Bridge	-2.12802	-281.629	103996	28.8876	-262.402	-17.0981
			Short Bridge	-2.27006	-281.771	102795	28.5541	-262.402	-17.0981
			Hollow	-2.22258	-281.723	272809	75.7803	-262.402	-17.0981
		mono-HCOO	Top	-2.65557	-289.147	253682	70.4672	-262.402	-24.0894
			Long Bridge	-3.31459	-289.806	170349	47.3192	-262.402	-24.0894
			Short Bridge	-3.4354	-289.927	593580	164.883	-262.402	-24.0894
			Hollow	-3.64422	-290.136	4633.51	1.28709	-262.402	-24.0894
		bi-HCOO	Top	-2.65528	-289.147	4643.2	1.28978	-262.402	-24.0894
			Long Bridge	-3.31456	-289.806	4629.07	1.28585	-262.402	-24.0894
			Short Bridge	-3.4403	-289.932	4617.46	1.28263	-262.402	-24.0894
			Hollow	-3.64554	-290.137	4686.71	1.30186	-262.402	-24.0894
		mono-H2CO	Top	-0.633145	-285.2	4626.86	1.28524	-262.402	-22.1645
			Long Bridge	-0.308629	-284.876	4923.03	1.36751	-262.402	-22.1645
			Short Bridge	-1.1764	-285.743	4761.83	1.32273	-262.402	-22.1645
			Hollow	-0.941322	-285.508	4708.39	1.30788	-262.402	-22.1645
		bi-H2CO	Top	-0.846594	-285.414	4894.7	1.35964	-262.402	-22.1645
			Long Bridge	-0.938638	-285.506	5006.88	1.3908	-262.402	-22.1645
			Short Bridge	-1.17694	-285.744	4833.9	1.34275	-262.402	-22.1645
			Hollow	-1.00458	-285.572	4659.55	1.29432	-262.402	-22.1645
		trans-COOH	Top	-2.31605	-289.202	4751.5	1.31986	-262.402	-24.4839
			Long Bridge	-2.34075	-289.227	4770.37	1.3251	-262.402	-24.4839
			Short Bridge	-2.42379	-289.31	4716.15	1.31004	-262.402	-24.4839
			Hollow	-2.52347	-289.41	4584.25	1.2734	-262.402	-24.4839
		cis-COOH	Top	-2.45324	-289.253	4531.04	1.25862	-262.402	-24.3973
			Long Bridge	-2.26766	-289.067	4848.71	1.34686	-262.402	-24.3973
			Short Bridge	-2.4528	-289.253	4771.26	1.32535	-262.402	-24.3973
			Hollow	-2.29196	-289.092	4930.8	1.36967	-262.402	-24.3973
		H2COO	Top	-3.56022	-291.633	4762.83	1.32301	-262.402	-25.6707
			Long Bridge	-3.5847	-291.658	5164.6	1.43461	-262.402	-25.6707
			Short Bridge	-3.77632	-291.85	4904.36	1.36232	-262.402	-25.6707
			Hollow	-4.84948	-292.923	4830.94	1.34193	-262.402	-25.6707
		HCOOH	Top	-0.445999	-292.622	4886.52	1.35737	-262.402	-29.7739
			Long Bridge	-0.675032	-292.851	4763.55	1.32321	-262.402	-29.7739
			Short Bridge	-0.833737	-293.01	4765.85	1.32385	-262.402	-29.7739
			Hollow	-0.66805	-292.844	4783.86	1.32885	-262.402	-29.7739
		CH3O	Top	-2.7166	-289.628	4687	1.30194	-262.402	-24.5093
			Long Bridge	-2.20786	-289.12	4722.83	1.3119	-262.402	-24.5093
			Short Bridge	-2.71996	-289.632	4719.16	1.31088	-262.402	-24.5093
			Hollow	-2.47108	-289.383	4456.52	1.23792	-262.402	-24.5093
		H2COH	Top	-1.99758	-289.292	4466.02	1.24056	-262.402	-24.8921
			Long Bridge	-1.80755	-289.102	4702.02	1.30612	-262.402	-24.8921
			Short Bridge	-1.84558	-289.14	4675.85	1.29885	-262.402	-24.8921
			Hollow	-1.89891	-289.194	4520.69	1.25575	-262.402	-24.8921
		CH3OH	Top	-0.565215	-293.229	4624.69	1.28464	-262.402	-30.2615
			Long Bridge	-0.694093	-293.358	4697.43	1.30484	-262.402	-30.2615
			Short Bridge	-0.796762	-293.461	4712.07	1.30891	-262.402	-30.2615
			Hollow	-0.78098	-293.445	4449.42	1.23595	-262.402	-30.2615
	Cu/Pt	H	Top	-2.6962	-281.177	31361.9	8.71163	-277.364	-1.11665
			Long Bridge	-2.88292	-281.364	40006.2	11.1128	-277.364	-1.11665
			Short Bridge	-2.91948	-281.4	33858.1	9.40503	-277.364	-1.11665
			Hollow	-2.88333	-281.364	64802.7	18.0008	-277.364	-1.11665
		O	Top	-4.12889	-283.037	75399.6	20.9443	-277.364	-1.54391
			Long Bridge	-4.46216	-283.37	61824	17.1733	-277.364	-1.54391
			Short Bridge	-4.80809	-283.716	39274.7	10.9096	-277.364	-1.54391
			Hollow	-4.54342	-283.451	53536.6	14.8713	-277.364	-1.54391
		H2	Top	-0.835116	-284.968	97088.3	26.969	-277.364	-6.76902
			Long Bridge	-0.550794	-284.684	83107.8	23.0855	-277.364	-6.76902
			Short Bridge	-0.835107	-284.968	125440	34.8445	-277.364	-6.76902
			Hollow	-1.29701	-285.43	67750.8	18.8197	-277.364	-6.76902
		OH	Top	-3.4747	-288.381	408165	113.379	-277.364	-7.54198
			Long Bridge	-3.10931	-288.015	99785.2	27.7181	-277.364	-7.54198
			Short Bridge	-3.47436	-288.38	130967	36.3797	-277.364	-7.54198
			Hollow	-3.47368	-288.38	148904	41.3621	-277.364	-7.54198
		H2O	Top	-0.437262	-292.03	213190	59.2195	-277.364	-14.2284
			Long Bridge	-0.570735	-292.163	351491	97.6365	-277.364	-14.2284
			Short Bridge	-0.628099	-292.221	186443	51.7896	-277.364	-14.2284
			Hollow	-0.697467	-292.29	548064	152.24	-277.364	-14.2284
		CO	Top	-2.15037	-294.305	130596	36.2767	-277.364	-14.7905
			Long Bridge	-2.2022	-294.357	111374	30.9373	-277.364	-14.7905
			Short Bridge	-2.06037	-294.215	81308.7	22.5858	-277.364	-14.7905
			Hollow	-2.20124	-294.356	56455.9	15.6822	-277.364	-14.7905
		CO2	Top	-0.236043	-300.584	22754.1	6.32059	-277.364	-22.9837
			Long Bridge	-0.660298	-301.008	49775.8	13.8266	-277.364	-22.9837
			Short Bridge	-0.229638	-300.577	57172.1	15.8811	-277.364	-22.9837
			Hollow	-0.658996	-301.007	102703	28.5287	-277.364	-22.9837
		HCO	Top	-2.67507	-297.137	11987	3.32971	-277.364	-17.0981
			Long Bridge	-2.66565	-297.128	17089.8	4.74718	-277.364	-17.0981
			Short Bridge	-2.67329	-297.135	89602.2	24.8895	-277.364	-17.0981
			Hollow	-2.66546	-297.128	23481.5	6.52264	-277.364	-17.0981
		mono-HCOO	Top	-3.30121	-304.755	7775.94	2.15998	-277.364	-24.0894
			Long Bridge	-2.46316	-303.917	84783.3	23.5509	-277.364	-24.0894
			Short Bridge	-3.30169	-304.755	270597	75.1659	-277.364	-24.0894
			Hollow	-3.2992	-304.753	174736	48.5377	-277.364	-24.0894
		bi-HCOO	Top	-2.51395	-303.967	25161.9	6.98942	-277.364	-24.0894
			Long Bridge	-3.30119	-304.755	5200.46	1.44457	-277.364	-24.0894
			Short Bridge	-3.36209	-304.815	32151.1	8.93085	-277.364	-24.0894
			Hollow	-3.44508	-304.898	6049.41	1.68039	-277.364	-24.0894
		mono-H2CO	Top	-0.644348	-300.173	243166	67.5462	-277.364	-22.1645
			Long Bridge	-1.19399	-300.722	333113	92.5313	-277.364	-22.1645
			Short Bridge	-1.36771	-300.896	17034.6	4.73183	-277.364	-22.1645
			Hollow	-0.247252	-299.776	40727.1	11.3131	-277.364	-22.1645
		bi-H2CO	Top	-0.919668	-300.448	14569.4	4.04706	-277.364	-22.1645
			Long Bridge	-1.18985	-300.718	4157.15	1.15477	-277.364	-22.1645
			Short Bridge	-1.36795	-300.896	7157.04	1.98807	-277.364	-22.1645
			Hollow	-1.14309	-300.672	26346.8	7.31856	-277.364	-22.1645
		trans-COOH	Top	-2.8221	-304.67	51472.6	14.2979	-277.364	-24.4839
			Long Bridge	-3.0479	-304.896	61078.3	16.9662	-277.364	-24.4839
			Short Bridge	-2.81559	-304.664	45480.1	12.6334	-277.364	-24.4839
			Hollow	-3.04283	-304.891	25351.4	7.04205	-277.364	-24.4839
		cis-COOH	Top	-2.76904	-304.53	4641.47	1.2893	-277.364	-24.3973
			Long Bridge	-2.53025	-304.292	11703.1	3.25086	-277.364	-24.3973
			Short Bridge	-2.76126	-304.523	44051.7	12.2366	-277.364	-24.3973
			Hollow	-3.26003	-305.021	7423.26	2.06202	-277.364	-24.3973
		H2COO	Top	-4.4359	-307.471	118554	32.9316	-277.364	-25.6707
			Long Bridge	-4.83281	-307.868	1734.34	0.481761	-277.364	-25.6707
			Short Bridge	-3.8865	-306.921	2511.48	0.697632	-277.364	-25.6707
			Hollow	-4.83278	-307.867	3614.97	1.00416	-277.364	-25.6707
		HCOOH	Top	-0.510598	-307.648	67805.5	18.8349	-277.364	-29.7739
			Long Bridge	-0.616274	-307.754	105251	29.2364	-277.364	-29.7739
			Short Bridge	-0.93079	-308.069	22358.5	6.2107	-277.364	-29.7739
			Hollow	-0.762492	-307.9	13615.1	3.78198	-277.364	-29.7739
		CH3O	Top	-2.71089	-304.584	2051.03	0.569731	-277.364	-24.5093
			Long Bridge	-2.3246	-304.198	40183.6	11.1621	-277.364	-24.5093
			Short Bridge	-2.72205	-304.595	27266.8	7.57411	-277.364	-24.5093
			Hollow	-2.36227	-304.236	11884	3.30112	-277.364	-24.5093
		H2COH	Top	-2.55037	-304.807	6985.28	1.94036	-277.364	-24.8921
			Long Bridge	-2.2481	-304.504	16253.8	4.51494	-277.364	-24.8921
			Short Bridge	-1.90819	-304.164	7809.98	2.16944	-277.364	-24.8921
			Hollow	-2.54883	-304.805	46495.6	12.9154	-277.364	-24.8921
		CH3OH	Top	-0.570086	-308.196	5508.74	1.53021	-277.364	-30.2615
			Long Bridge	-0.758034	-308.384	59755.8	16.5988	-277.364	-30.2615
			Short Bridge	-0.861015	-308.487	59677.6	16.5771	-277.364	-30.2615
			Hollow	-0.80579	-308.431	55669.8	15.4638	-277.364	-30.2615
	Cu/Zn	H	Top	-1.9207	-198.571	17185.3	4.77371	-195.533	-1.11665
			Long Bridge	-1.92727	-198.577	33880.9	9.41135	-195.533	-1.11665
			Short Bridge	-2.37567	-199.026	24262.9	6.73971	-195.533	-1.11665
			Hollow	-2.39875	-199.049	38023.9	10.5622	-195.533	-1.11665
		O	Top	-4.82525	-201.903	100671	27.964	-195.533	-1.54391
			Long Bridge	-4.84154	-201.919	33685.6	9.35711	-195.533	-1.54391
			Short Bridge	-4.82564	-201.903	27398.1	7.61058	-195.533	-1.54391
			Hollow	-4.90888	-201.986	29351.4	8.15316	-195.533	-1.54391
		H2	Top	-0.0510437	-202.354	75996.4	21.1101	-195.533	-6.76902
			Long Bridge	-0.0542375	-202.357	80619.5	22.3943	-195.533	-6.76902
			Short Bridge	-0.0613342	-202.364	63235.9	17.5655	-195.533	-6.76902
			Hollow	-0.0499165	-202.352	100383	27.8843	-195.533	-6.76902
		OH	Top	-3.73803	-206.814	297690	82.6918	-195.533	-7.54198
			Long Bridge	-3.37305	-206.449	100993	28.0537	-195.533	-7.54198
			Short Bridge	-3.7384	-206.814	129915	36.0875	-195.533	-7.54198
			Hollow	-3.73739	-206.813	154514	42.9204	-195.533	-7.54198
		H2O	Top	-0.465338	-210.227	265338	73.705	-195.533	-14.2284
			Long Bridge	-0.501328	-210.263	515442	143.178	-195.533	-14.2284
			Short Bridge	-0.360569	-210.122	108028	30.0079	-195.533	-14.2284
			Hollow	-0.504542	-210.266	660876	183.577	-195.533	-14.2284
		CO	Top	-0.457695	-210.782	131311	36.4753	-195.533	-14.7905
			Long Bridge	-0.456901	-210.781	566492	157.359	-195.533	-14.7905
			Short Bridge	-1.08555	-211.41	42712.3	11.8645	-195.533	-14.7905
			Hollow	-1.08323	-211.407	61831.9	17.1755	-195.533	-14.7905
		CO2	Top	-0.166001	-218.683	8172.28	2.27008	-195.533	-22.9837
			Long Bridge	-0.191841	-218.709	59591	16.5531	-195.533	-22.9837
			Short Bridge	-0.178476	-218.696	76318.2	21.1995	-195.533	-22.9837
			Hollow	-0.233196	-218.75	31942.2	8.87284	-195.533	-22.9837
		HCO	Top	-1.53933	-214.171	14272.8	3.96466	-195.533	-17.0981
			Long Bridge	-1.54258	-214.174	45621.8	12.6727	-195.533	-17.0981
			Short Bridge	-1.71589	-214.347	100594	27.9428	-195.533	-17.0981
			Hollow	-1.95112	-214.583	40748.1	11.3189	-195.533	-17.0981
		mono-HCOO	Top	-3.4508	-223.074	45919.5	12.7554	-195.533	-24.0894
			Long Bridge	-3.4508	-223.074	24792.2	6.88671	-195.533	-24.0894
			Short Bridge	-3.44924	-223.072	102730	28.5362	-195.533	-24.0894
			Hollow	-3.45073	-223.074	89833.6	24.9538	-195.533	-24.0894
		bi-HCOO	Top	-2.85211	-222.475	16891.2	4.692	-195.533	-24.0894
			Long Bridge	-3.45087	-223.074	15670	4.35278	-195.533	-24.0894
			Short Bridge	-3.61784	-223.241	17275.9	4.79887	-195.533	-24.0894
			Hollow	-3.403	-223.026	12277.3	3.41036	-195.533	-24.0894
		mono-H2CO	Top	-0.475831	-218.174	267336	74.2599	-195.533	-22.1645
			Long Bridge	-0.482458	-218.18	223125	61.9792	-195.533	-22.1645
			Short Bridge	-0.459615	-218.158	107511	29.8642	-195.533	-22.1645
			Hollow	-0.729238	-218.427	210014	58.3372	-195.533	-22.1645
		bi-H2CO	Top	-0.666553	-218.365	129668	36.0189	-195.533	-22.1645
			Long Bridge	-0.488037	-218.186	48695.9	13.5266	-195.533	-22.1645
			Short Bridge	-0.576512	-218.275	47061.6	13.0727	-195.533	-22.1645
			Hollow	-0.728921	-218.427	4278.44	1.18846	-195.533	-22.1645
		trans-COOH	Top	-2.01956	-222.037	47629.7	13.2305	-195.533	-24.4839
			Long Bridge	-2.07022	-222.088	44922.2	12.4784	-195.533	-24.4839
			Short Bridge	-1.99583	-222.013	24204	6.72332	-195.533	-24.4839
			Hollow	-2.2593	-222.277	36282.4	10.0784	-195.533	-24.4839
		cis-COOH	Top	-1.94841	-221.879	1194.27	0.331743	-195.533	-24.3973
			Long Bridge	-2.20019	-222.131	44014	12.2261	-195.533	-24.3973
			Short Bridge	-2.0539	-221.985	13288.5	3.69126	-195.533	-24.3973
			Hollow	-2.39555	-222.326	49968.8	13.8802	-195.533	-24.3973
		H2COO	Top	-4.20483	-225.409	4340.62	1.20573	-195.533	-25.6707
			Long Bridge	-5.37375	-226.578	1691.9	0.469973	-195.533	-25.6707
			Short Bridge	-4.11294	-225.317	3458.11	0.960586	-195.533	-25.6707
			Hollow	-5.37381	-226.578	1705.89	0.473858	-195.533	-25.6707
		HCOOH	Top	-0.346816	-225.654	49597.5	13.7771	-195.533	-29.7739
			Long Bridge	-0.371853	-225.679	24970.3	6.93621	-195.533	-29.7739
			Short Bridge	-0.40288	-225.71	62731.6	17.4255	-195.533	-29.7739
			Hollow	-0.497049	-225.804	26436.5	7.34347	-195.533	-29.7739
		CH3O	Top	-2.92286	-222.966	15806.5	4.39071	-195.533	-24.5093
			Long Bridge	-2.53351	-222.576	53515.4	14.8654	-195.533	-24.5093
			Short Bridge	-2.92038	-222.963	4679.04	1.29973	-195.533	-24.5093
			Hollow	-2.92257	-222.965	19509.7	5.41935	-195.533	-24.5093
		H2COH	Top	-1.72046	-222.146	2272.71	0.631309	-195.533	-24.8921
			Long Bridge	-1.61003	-222.036	48391.6	13.4421	-195.533	-24.8921
			Short Bridge	-1.6867	-222.112	24637.3	6.84371	-195.533	-24.8921
			Hollow	-1.47277	-221.898	18296.9	5.08247	-195.533	-24.8921
		CH3OH	Top	-0.642745	-226.438	46096.3	12.8045	-195.533	-30.2615
			Long Bridge	-0.629419	-226.424	64921.9	18.0339	-195.533	-30.2615
			Short Bridge	-0.641099	-226.436	41853.2	11.6259	-195.533	-30.2615
			Hollow	-0.577913	-226.373	7500.13	2.08337	-195.533	-30.2615
